# Supplementary material for: First syntheses of the biologically active fungal metabolites pestalotiopsones A, B, C and F
Source: Royal Society of Chemistry journal article supplement (doi:10.1039/c2ob26904j), 2012-12-18

# First Syntheses of Biologically Active Fungal Metabolites Pestalotiopsones A, B, C and F.

*Andrew Michael Beekman,<sup>a</sup> Edwin Castillo Martinez<sup>a</sup> and Russell Allan Barrow<sup>a,\*</sup>*

<sup>a</sup>Research School of Chemistry, The Australian National University, Canberra, ACT 0200,  
Australia.

[\\*rab@anu.edu.au](mailto:*rab@anu.edu.au)

## Supporting Information Index

|                                                                                              |    |
|----------------------------------------------------------------------------------------------|----|
| <b>General Experimental Conditions</b>                                                       | 2  |
| <b><sup>1</sup>H NMR and <sup>13</sup>C NMR spectra of new compounds: 6-9, 11-15</b>         | 3  |
| <b><sup>1</sup>H NMR and <sup>13</sup>C NMR spectra of synthesised natural products: 1-4</b> | 13 |
| <b>HPLC traces of synthesised natural products: 1-4</b>                                      | 17 |

## General Experimental Conditions

### Apparatus

$^1\text{H}$  and  $^{13}\text{C}$  NMR spectra were recorded at 298 K, at 300 MHz or 400 MHz and 75 MHz or 100 MHz respectively, on an Inova 300, Varian Mercury 300 or Varian MR-400 instrument. Chemical shifts are reported in ppm ( $\delta$ ).  $^1\text{H}$  NMR spectra are referenced to the resonance from residual  $\text{CHCl}_3$  at 7.26 ppm, the central peak in the resonance from residual  $\text{CHD}_2\text{COCD}_3$  at 2.05 ppm and the central peak in the signal from residual  $\text{CHD}_2\text{OD}$  at 3.31 ppm.  $^{13}\text{C}$  NMR spectra are referenced to the central peak in the signal from  $\text{CDCl}_3$  at 77.0 ppm, the central peak in the resonance from  $(\text{CD}_3)_2\text{CO}$  at 29.8 ppm and the central peak in the signal from  $\text{CD}_3\text{OD}$  at 49.0 ppm. The appearance and multiplicities of  $^1\text{H}$  resonances are expressed by the abbreviations: s (singlet), d (doublet), t (triplet), q (quartet), m (multiplet) and combinations thereof for more highly coupled systems.  $^{13}\text{C}$  NMR were run as proton decoupled spectra.  $^1\text{H}$  signals and  $^{13}\text{C}$  signals where appropriate are described by chemical shift  $\delta$  (integration, multiplicity,  $|J|$  (Hz), assignment). EI-MS and HREI-MS were recorded on a VG autospec mass spectrometer or Waters autospec premier mass spectrometer, operating at 70 eV. ESI-MS and HRESI-MS were recorded on a Bruker Apex 3. Positive ionisation was detected unless otherwise indicated. Mass/charge ratios ( $m/z$ ) are reported and relative abundance of the ions as percentage of base peak intensity. IR spectra were recorded on a Bruker Alpha-P ATR as neat solid or film. Characteristic peaks ( $\nu_{\text{max}}$ ) are recorded in wavenumbers. UV spectra were measured on a Cary 4G UV-Visible Spectrophotometer using a 1 cm solution cell in the solvent indicated. Spectra maxima are recorded in nm (log $\epsilon$ ). Microwave reactions were carried out using an Explorer CEM Automated Microwave Workstation in 10 mL reaction vessels at the wattage and pressure stated.

### Chromatography

Thin layer chromatography (TLC) was run on Merck silica gel 60 F<sub>254</sub> aluminium backed plates, and were run in the eluting system described for each plate. Plates were viewed under UV light (254 nm) and/or by developing in potassium permanganate (100 mL water, 1 g  $\text{KMnO}_4$ , 6 g  $\text{K}_2\text{CO}_3$ , 0.2 g  $\text{NaOH}$ ) or ceric phosphomolybdic acid (100 mL water, 5 g  $12\text{MoO}_3 \cdot \text{H}_3\text{PO}_4$ , 0.6 g  $\text{Ce}(\text{SO}_4)_2$ , 6 mL conc.  $\text{H}_2\text{SO}_4$ ) dip. Flash chromatography was performed under pressure using silica gel (230–400 mesh Scharlau 60) as solid support and HPLC-graded solvents as eluent. Semi-preparative HPLC was performed using an Agilent 1100 system, utilising a Phenomenex LUNA 5 $\mu$  C18 250  $\times$  10.00 mm column and an Agilent 1100 series diode array detector for eluate detection. Elution was carried out using milli-Q water and pre-filtered (0.45  $\mu\text{m}$  nylon membrane filter) methanol in a 30 % v/v water/methanol solution at 1.5 mL/min with detection at 243 nm.

### Solvents and reagents

In general reagents were purchased from commercial suppliers and used without further purification unless otherwise stated. All solvents were dried and distilled either immediately prior to use or stored as appropriate. Ethereal solvents  $\text{Et}_2\text{O}$  and THF were refluxed over sodium and benzophenone. Toluene was refluxed over sodium,  $\text{CH}_2\text{Cl}_2$  was refluxed with and distilled from  $\text{CaH}_2$  and acetone was refluxed with and distilled from  $\text{Na}_2\text{SO}_4$ .

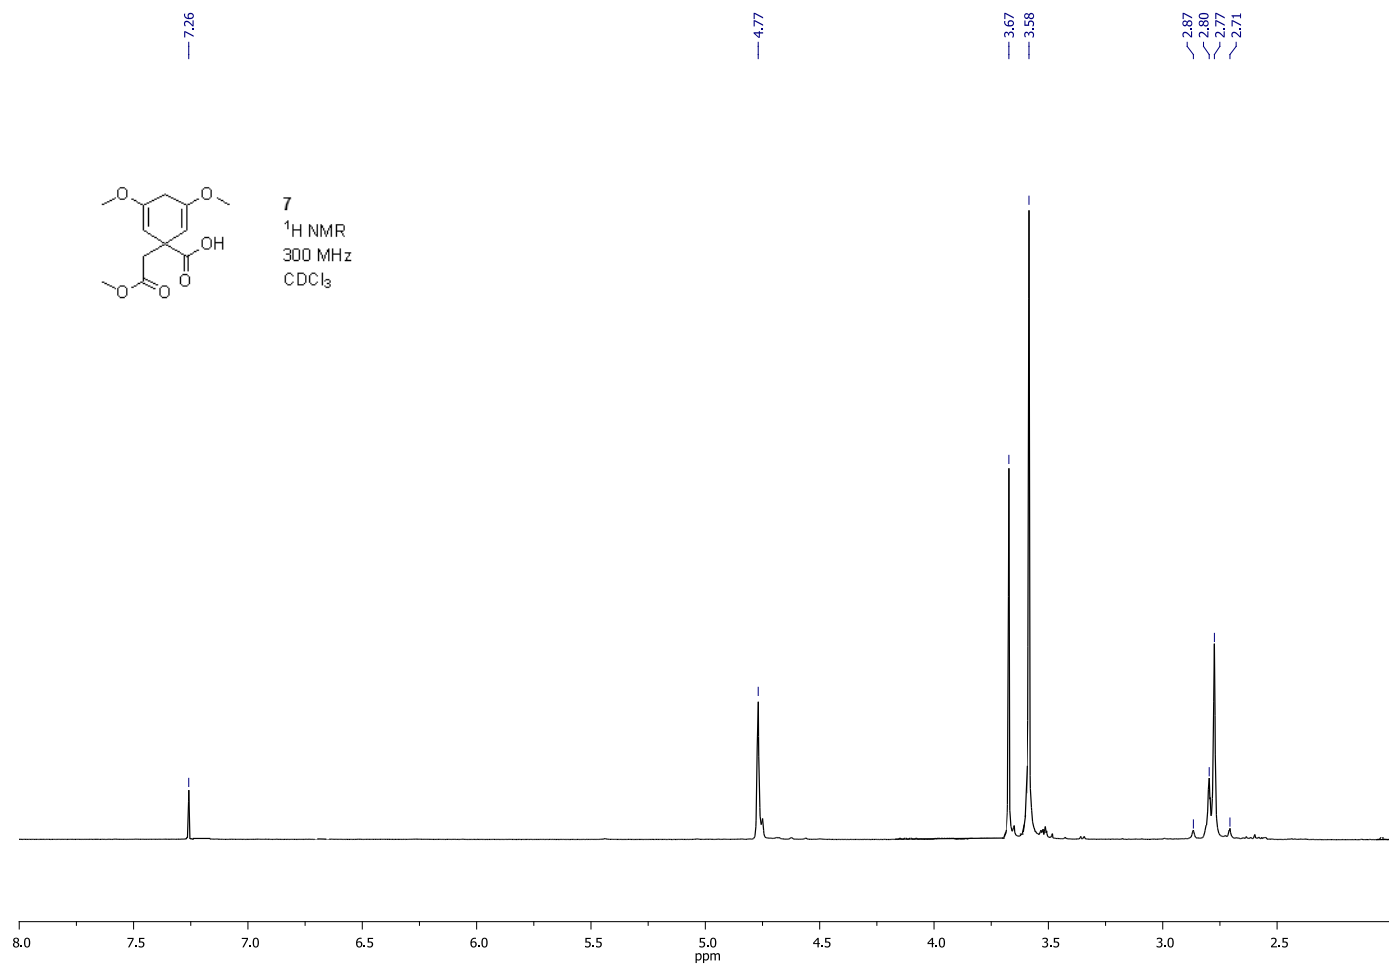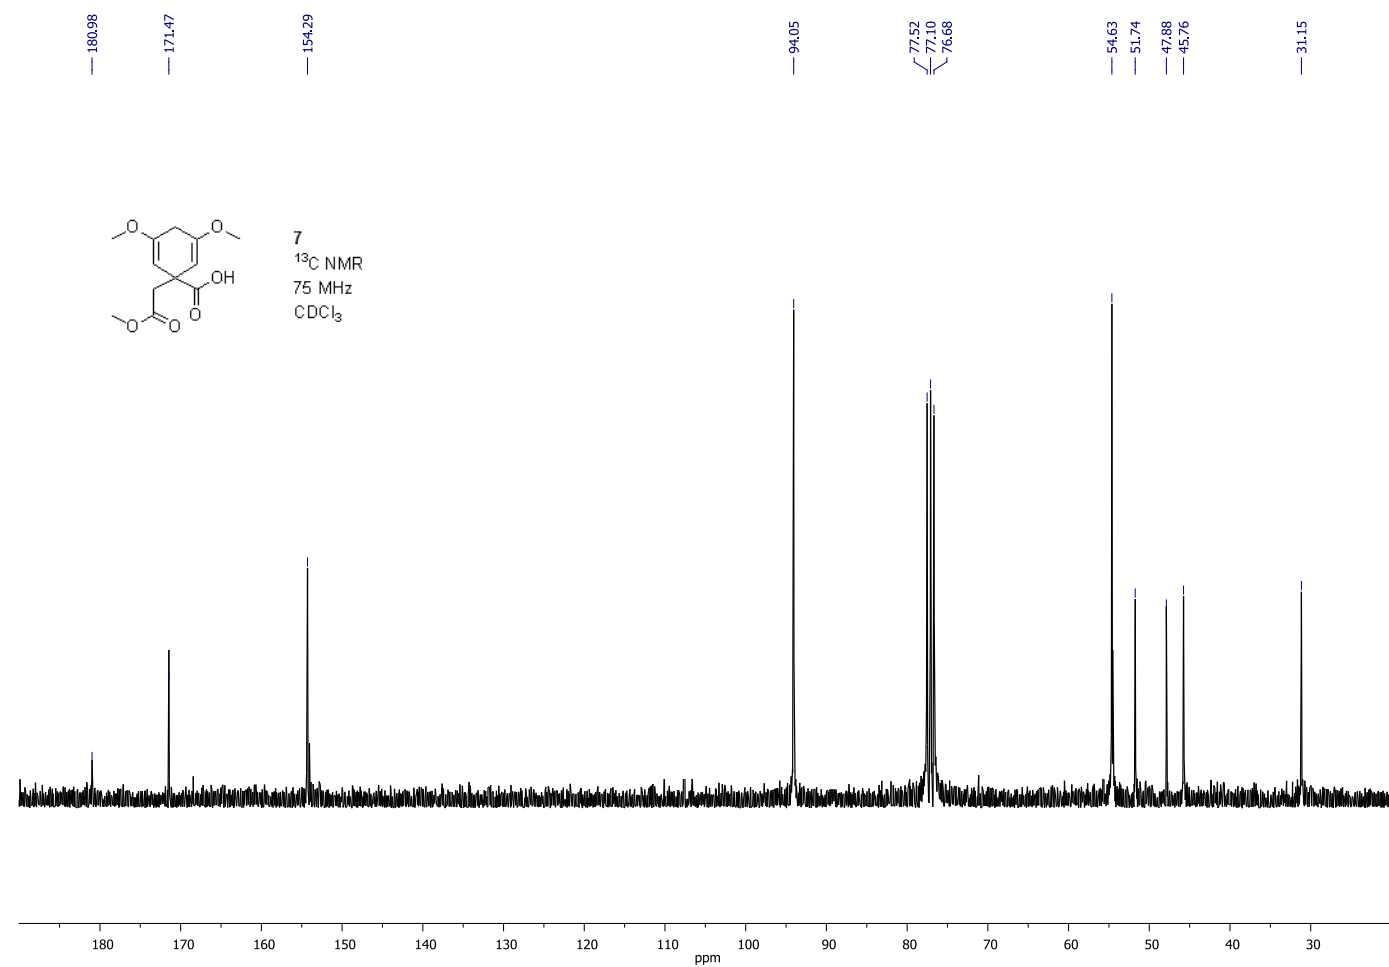

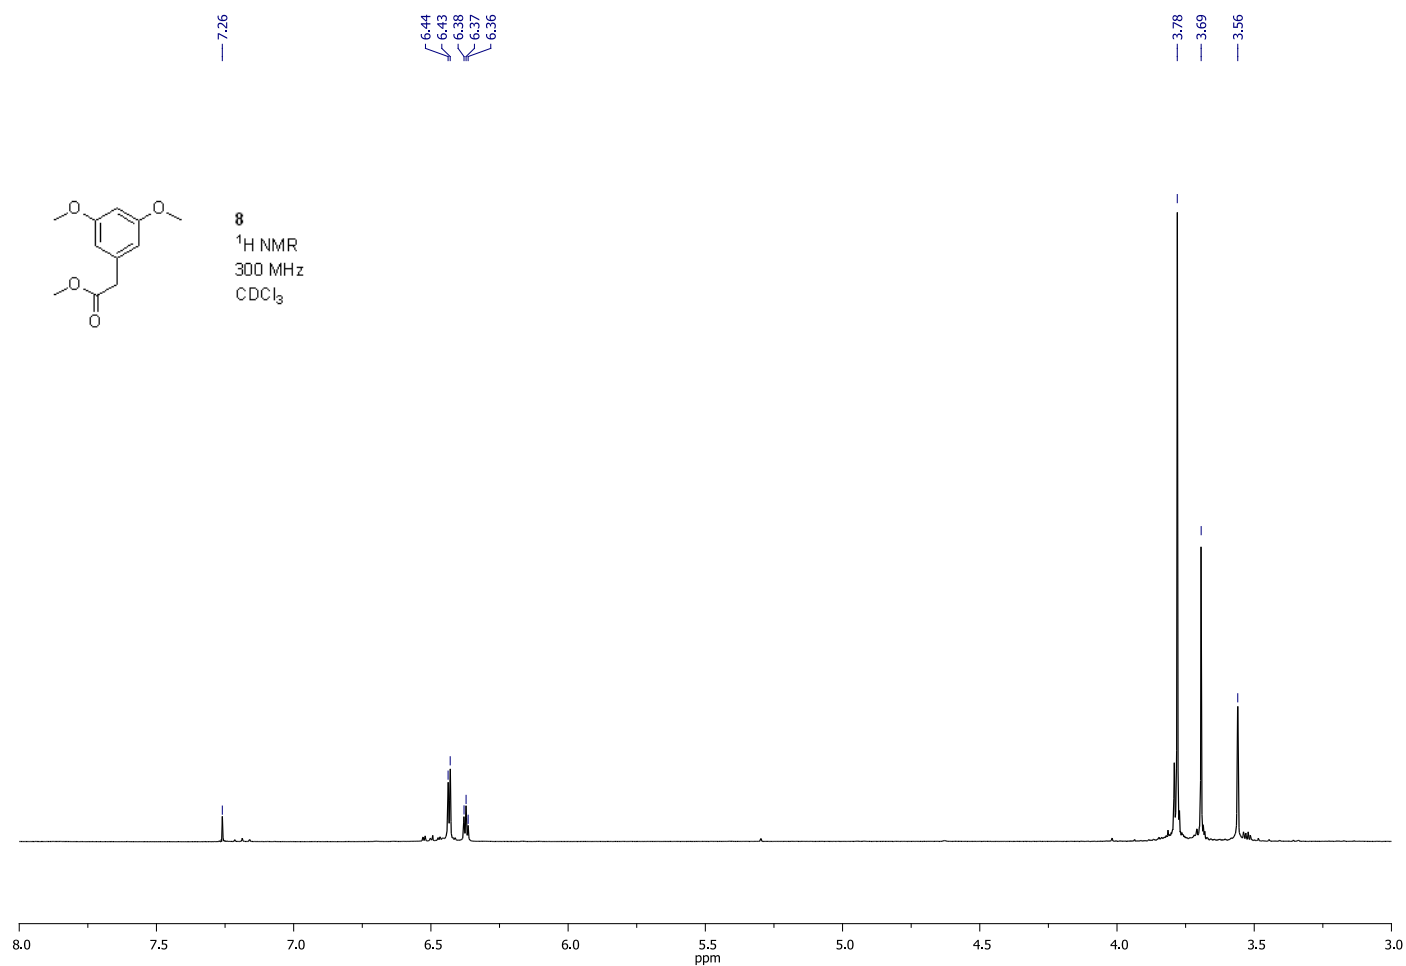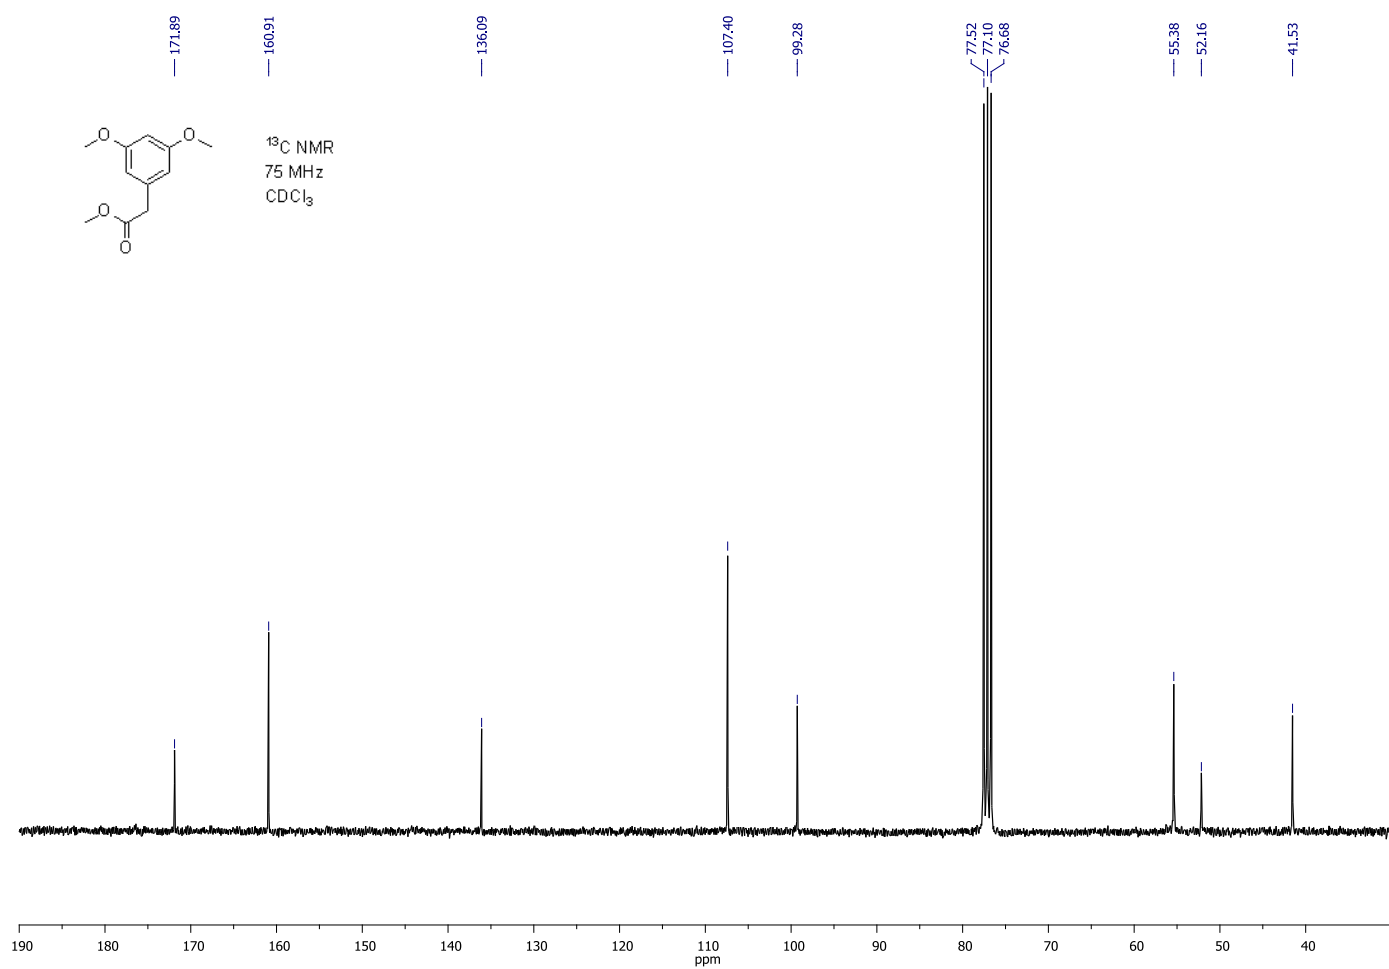

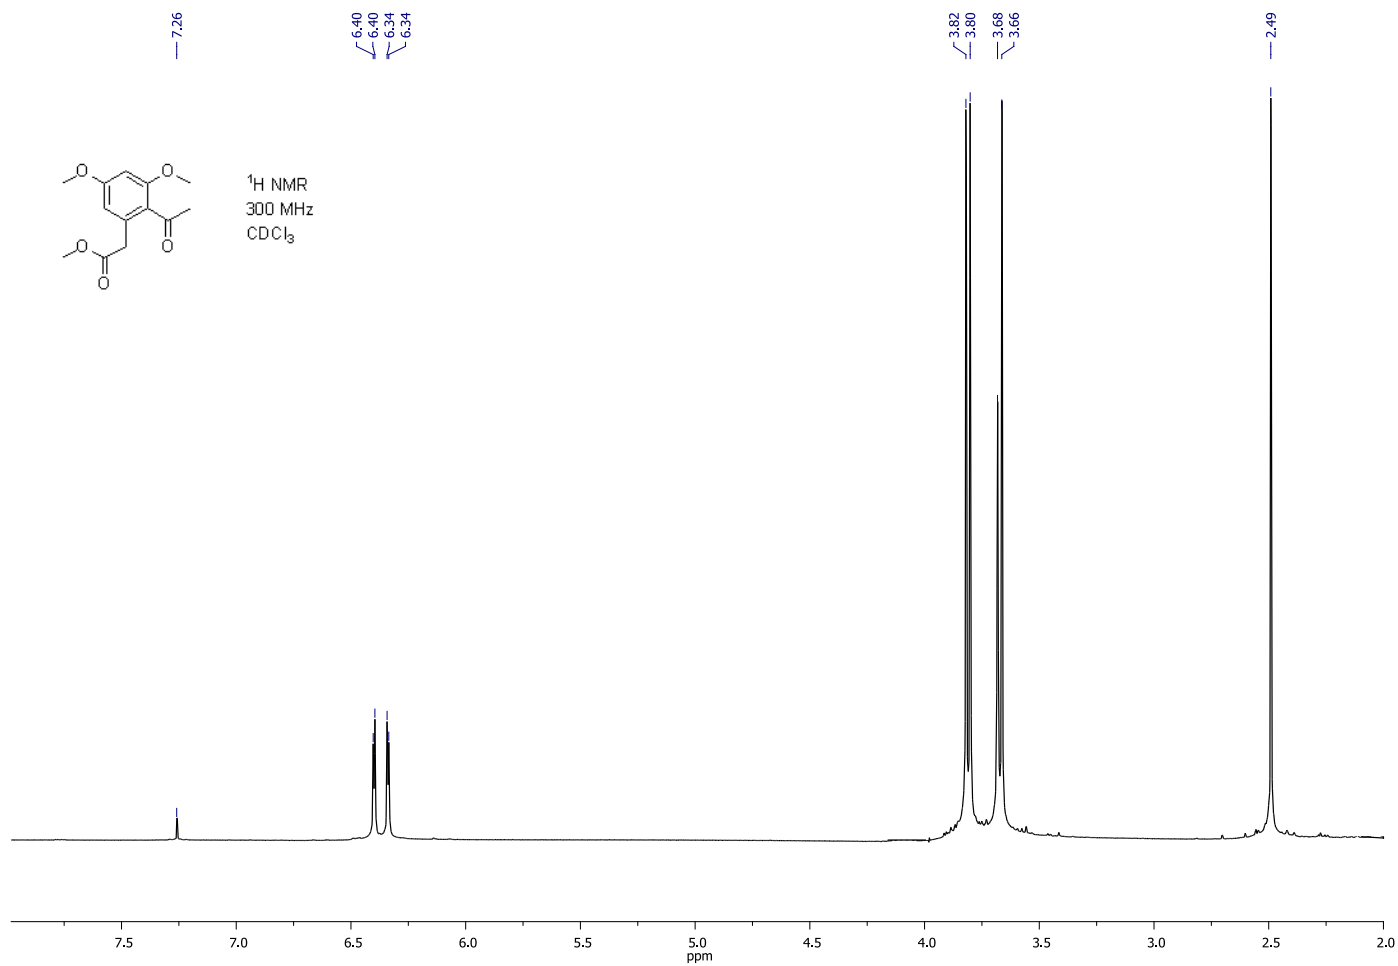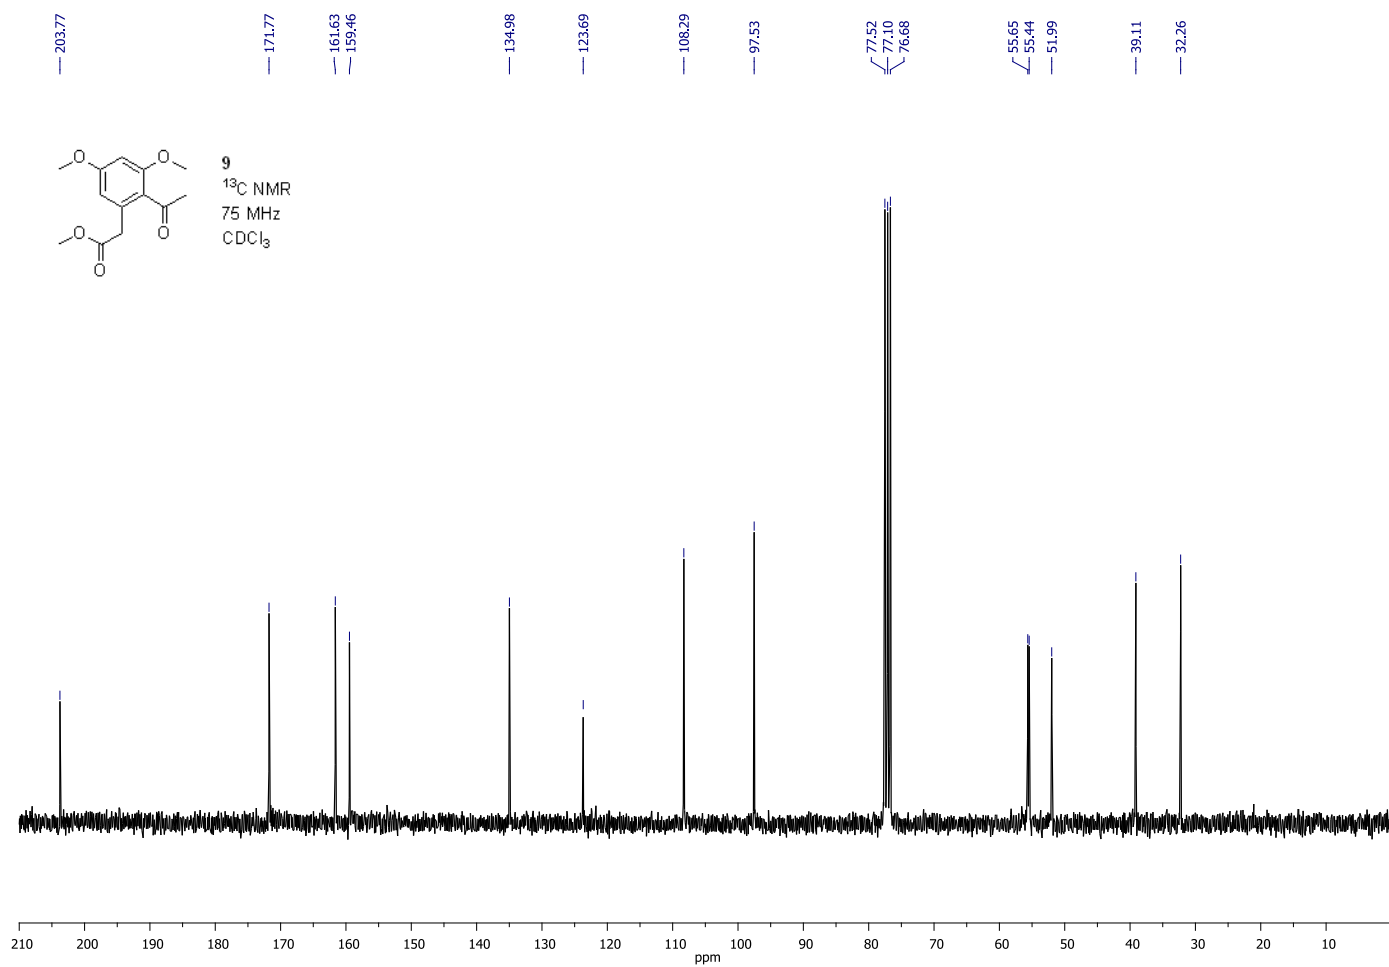

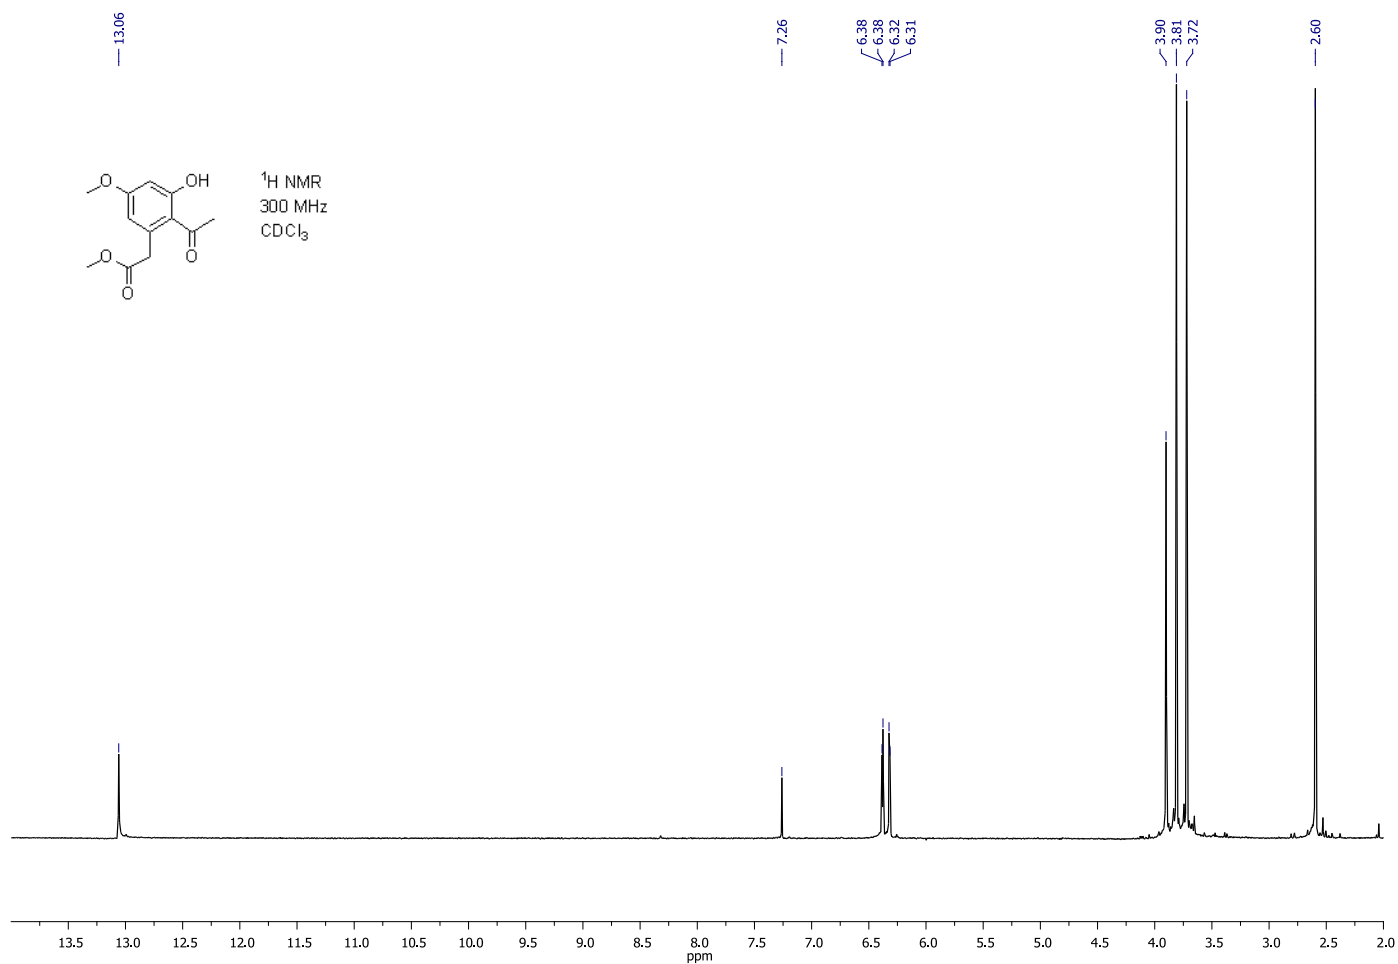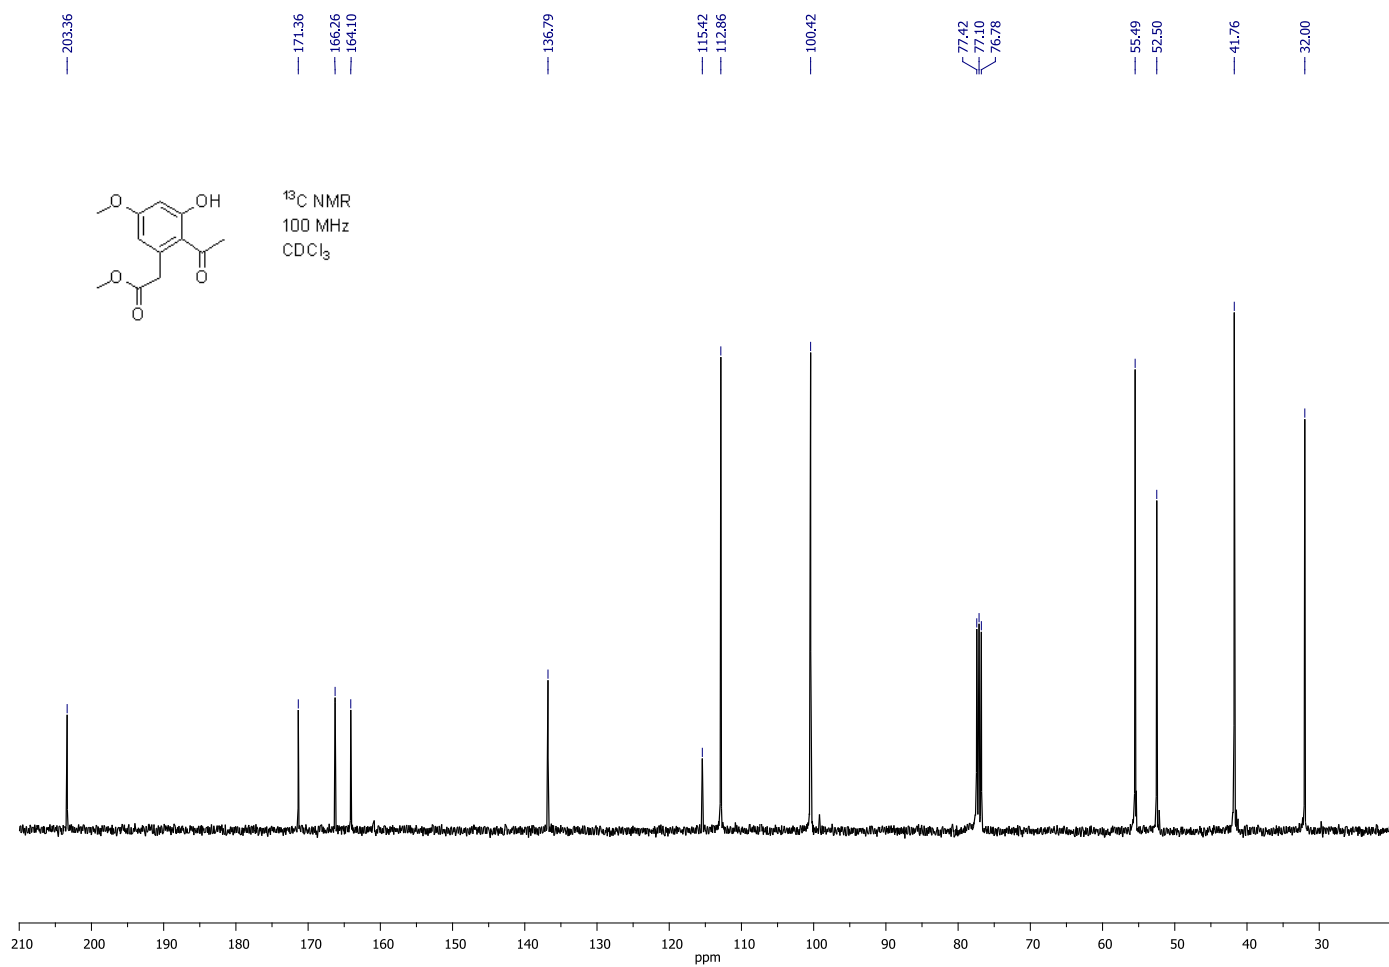

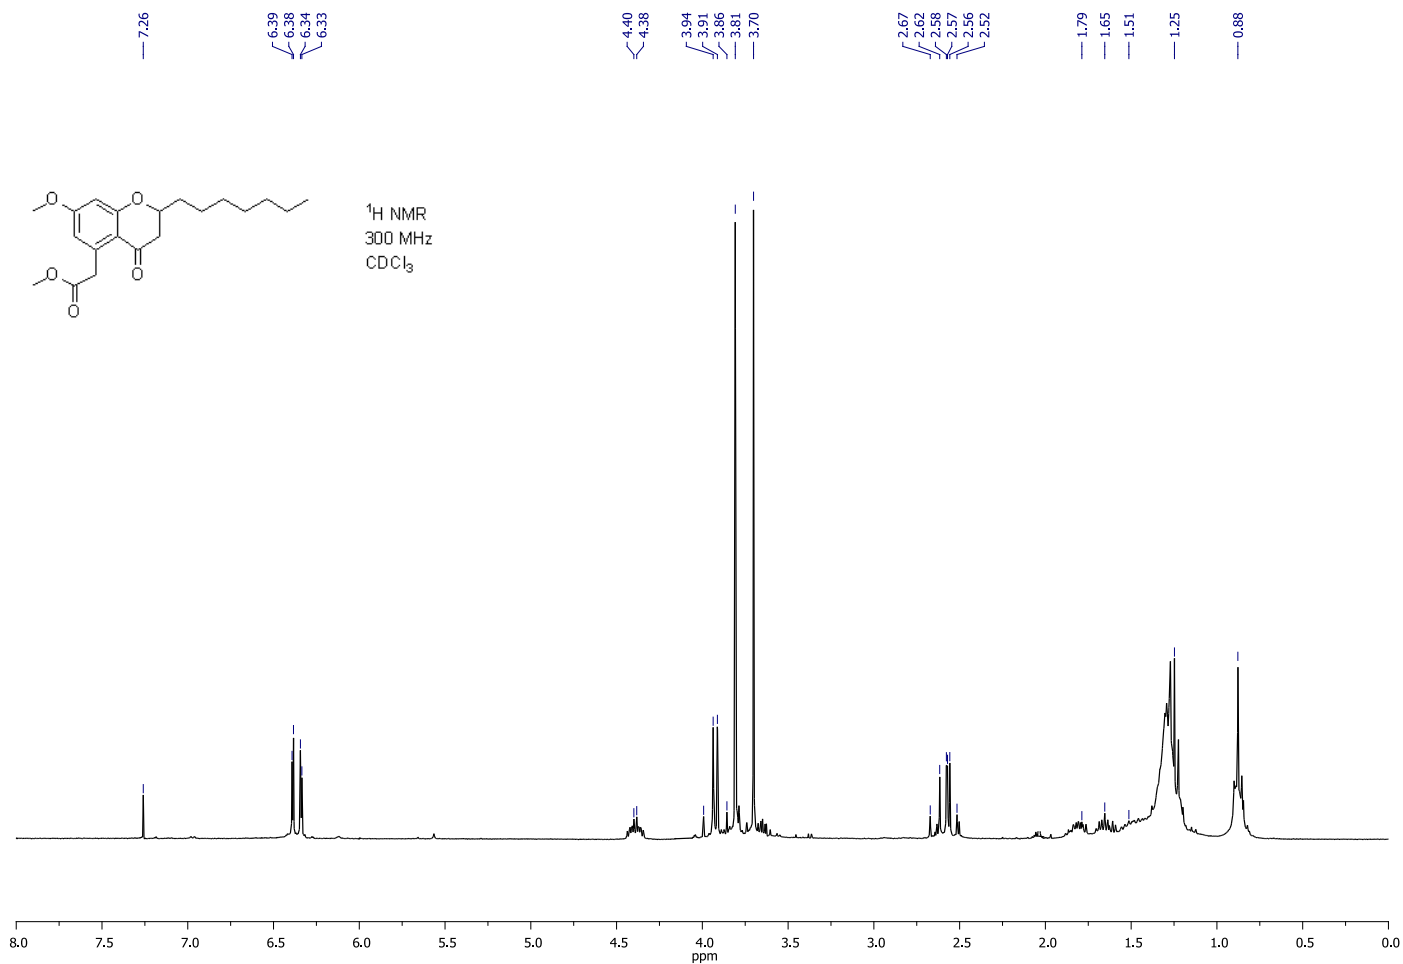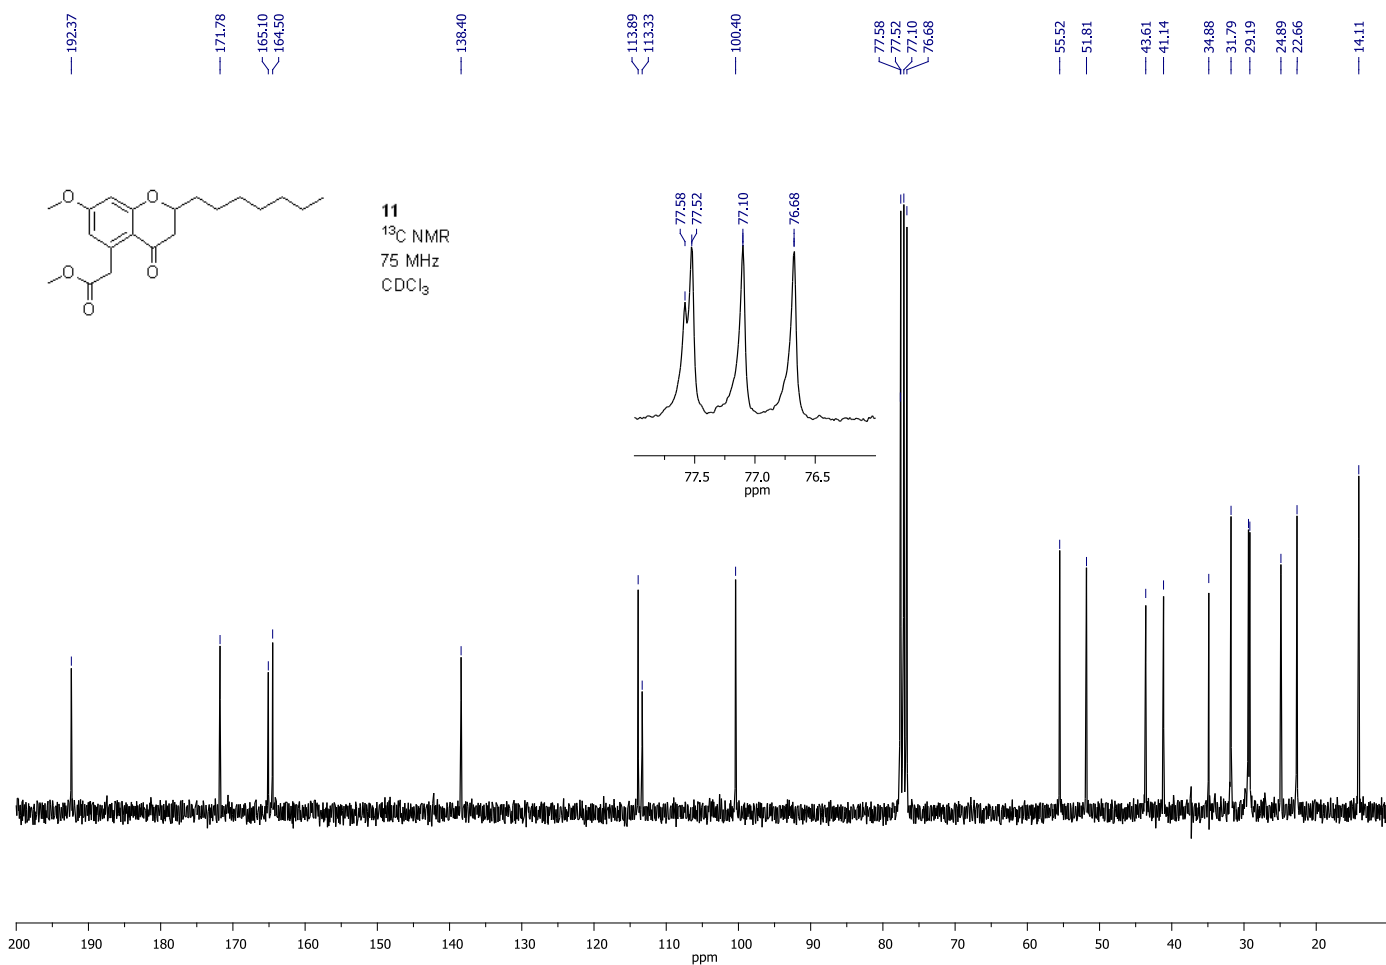

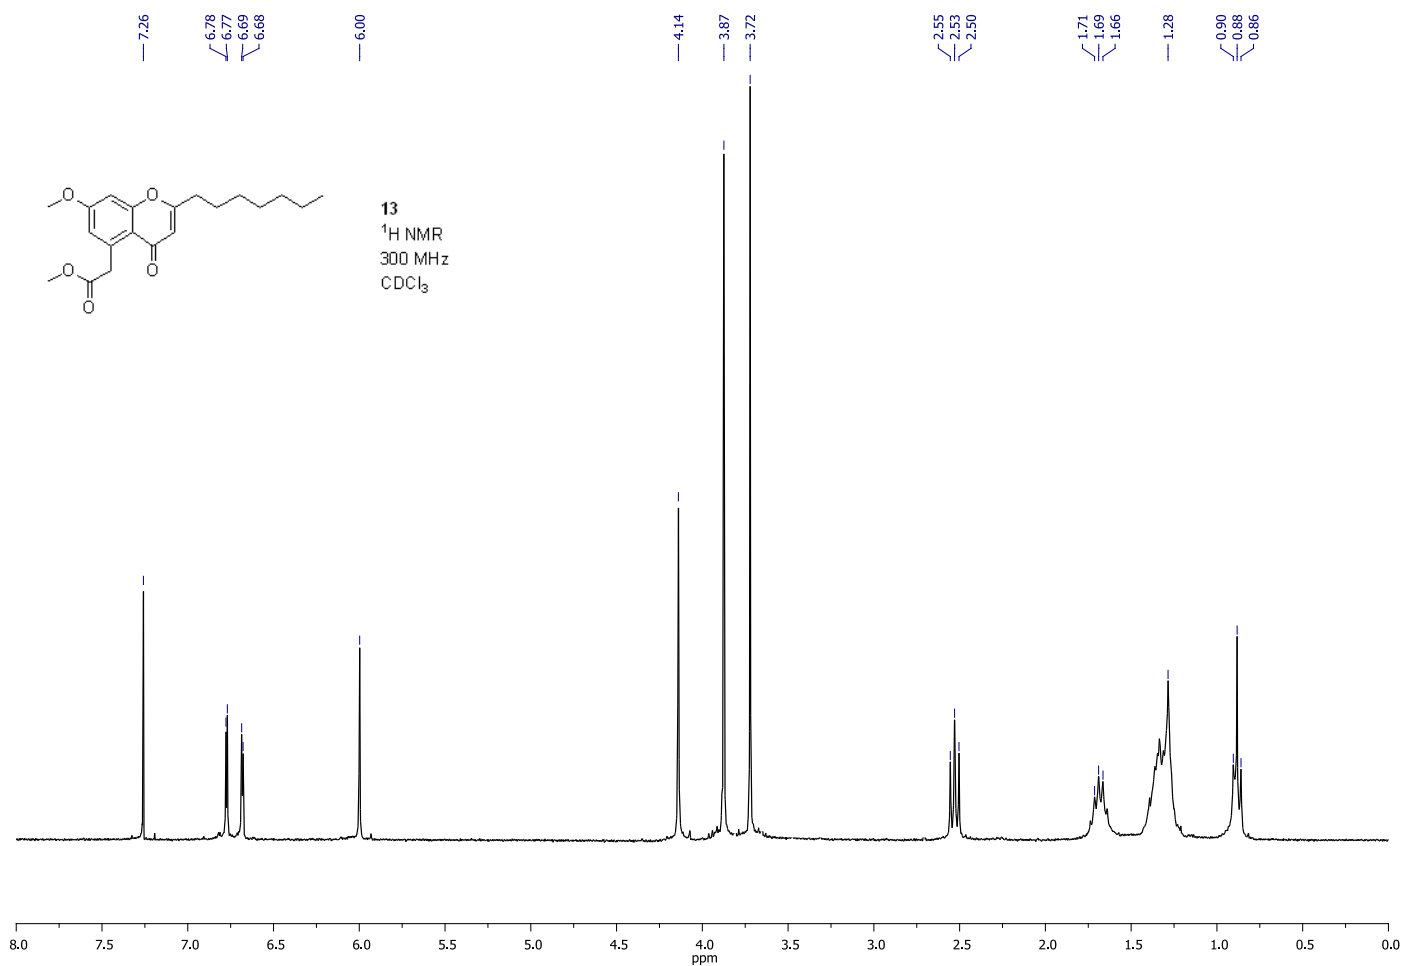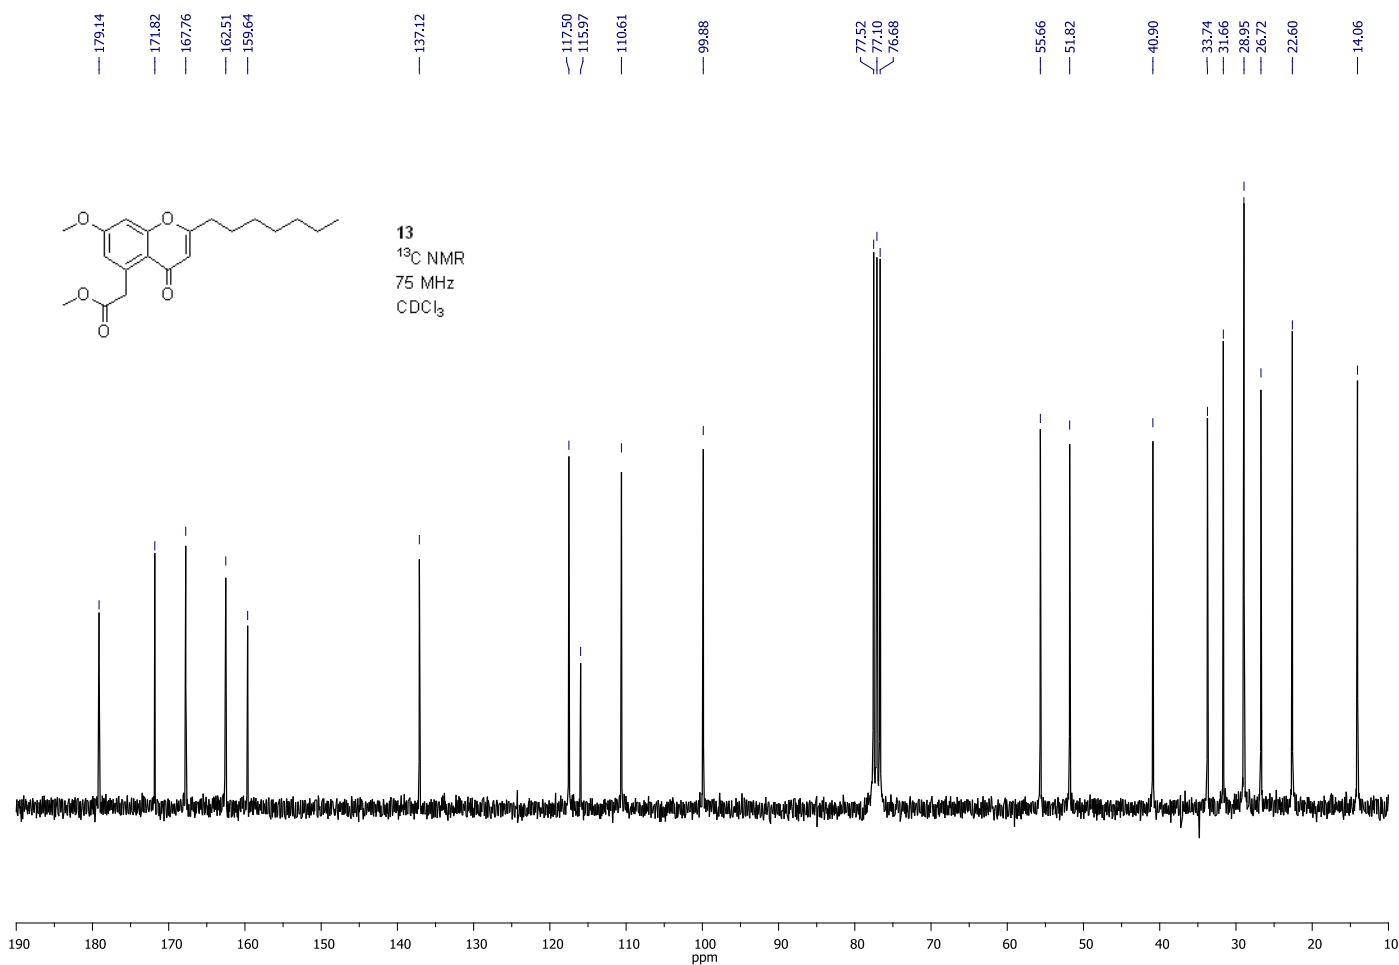



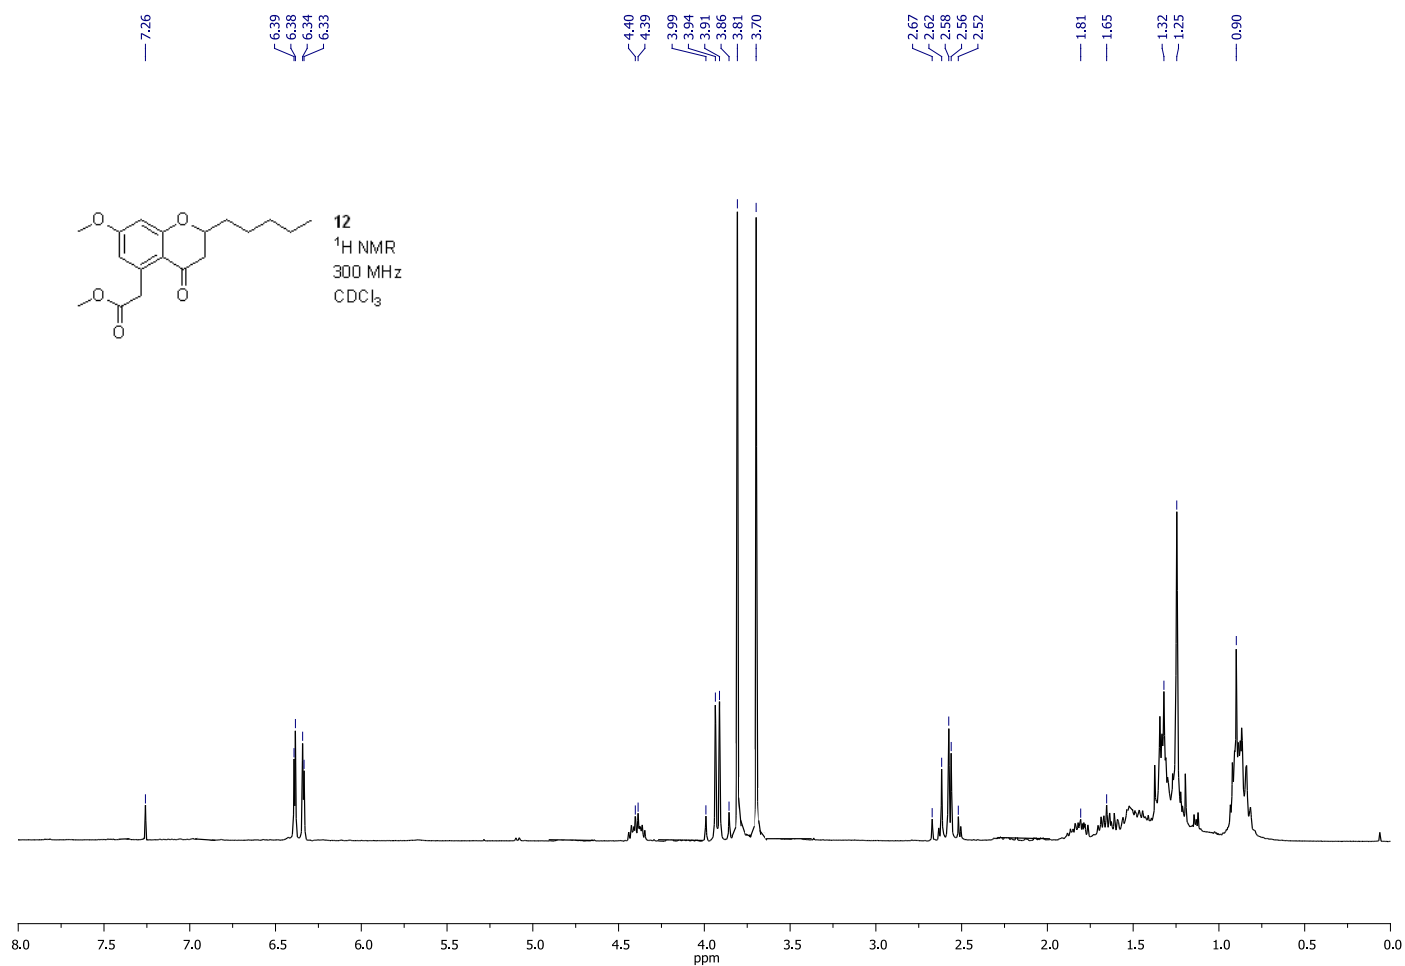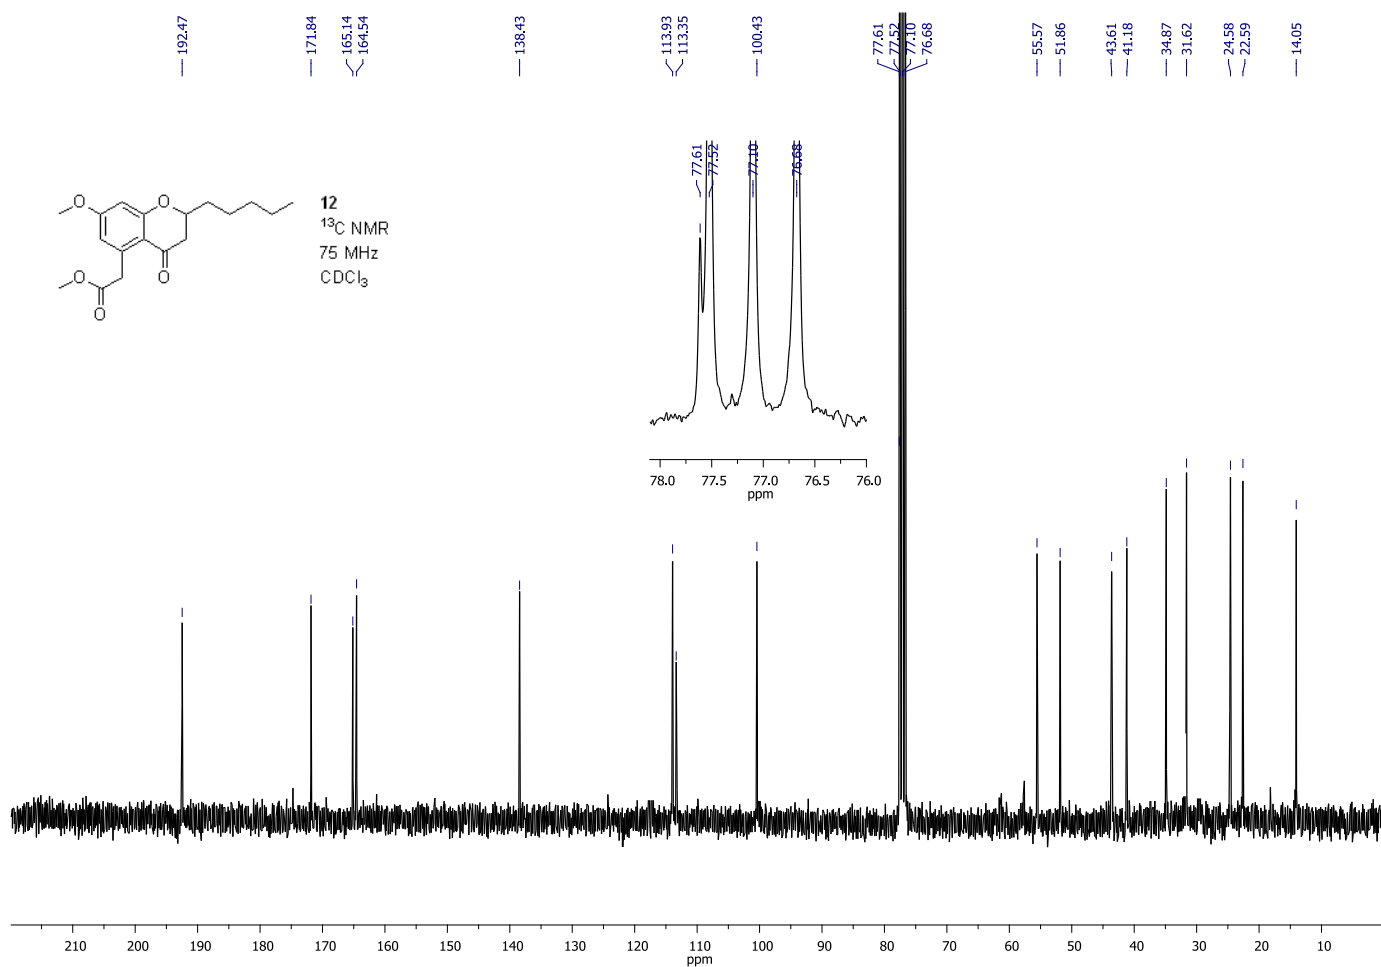

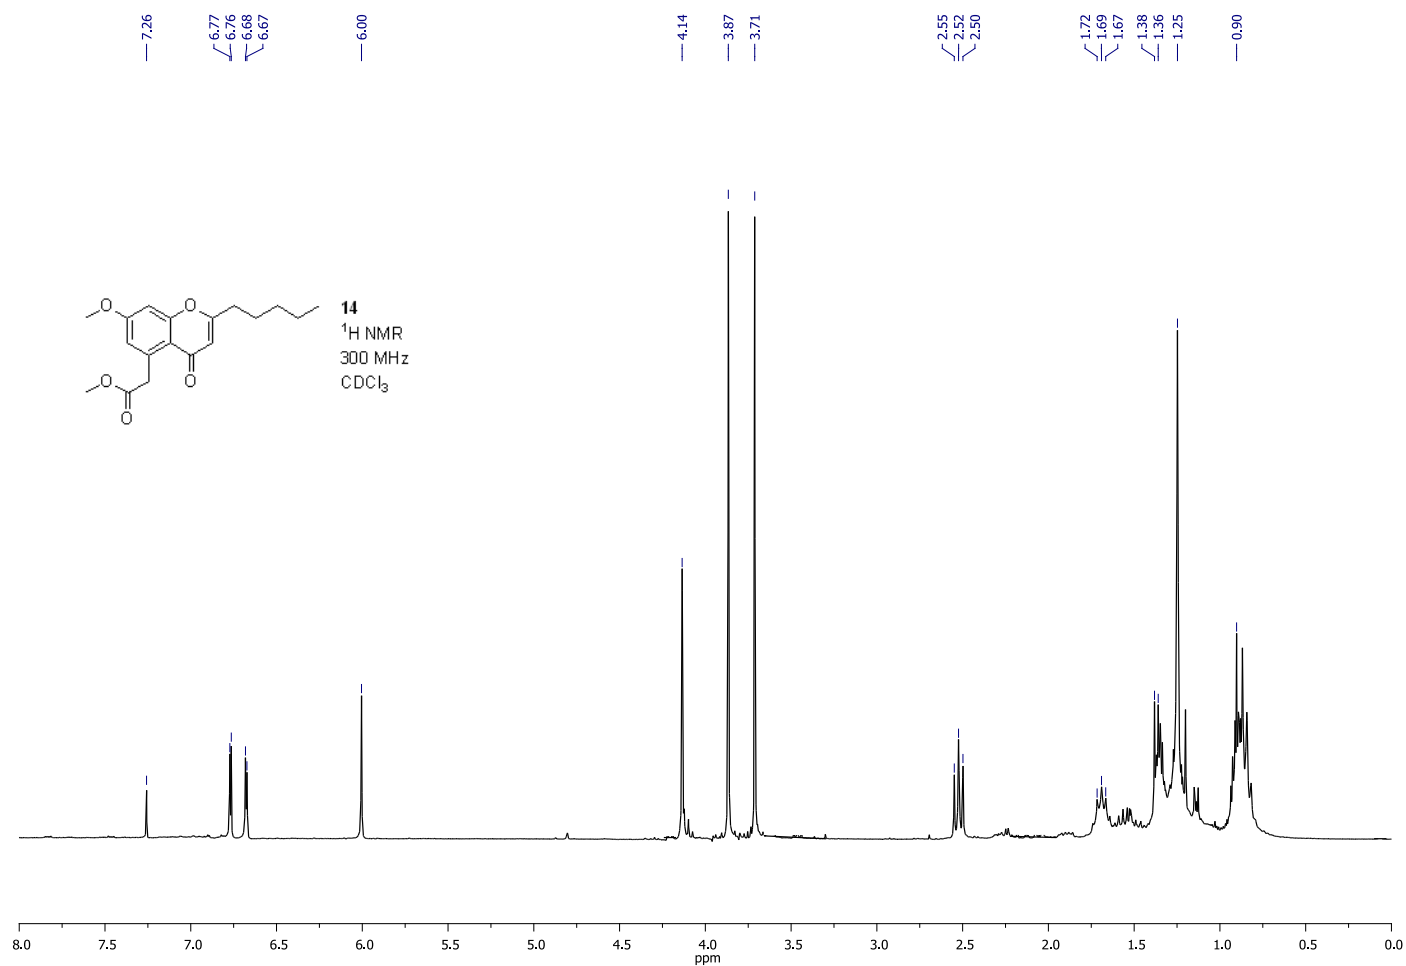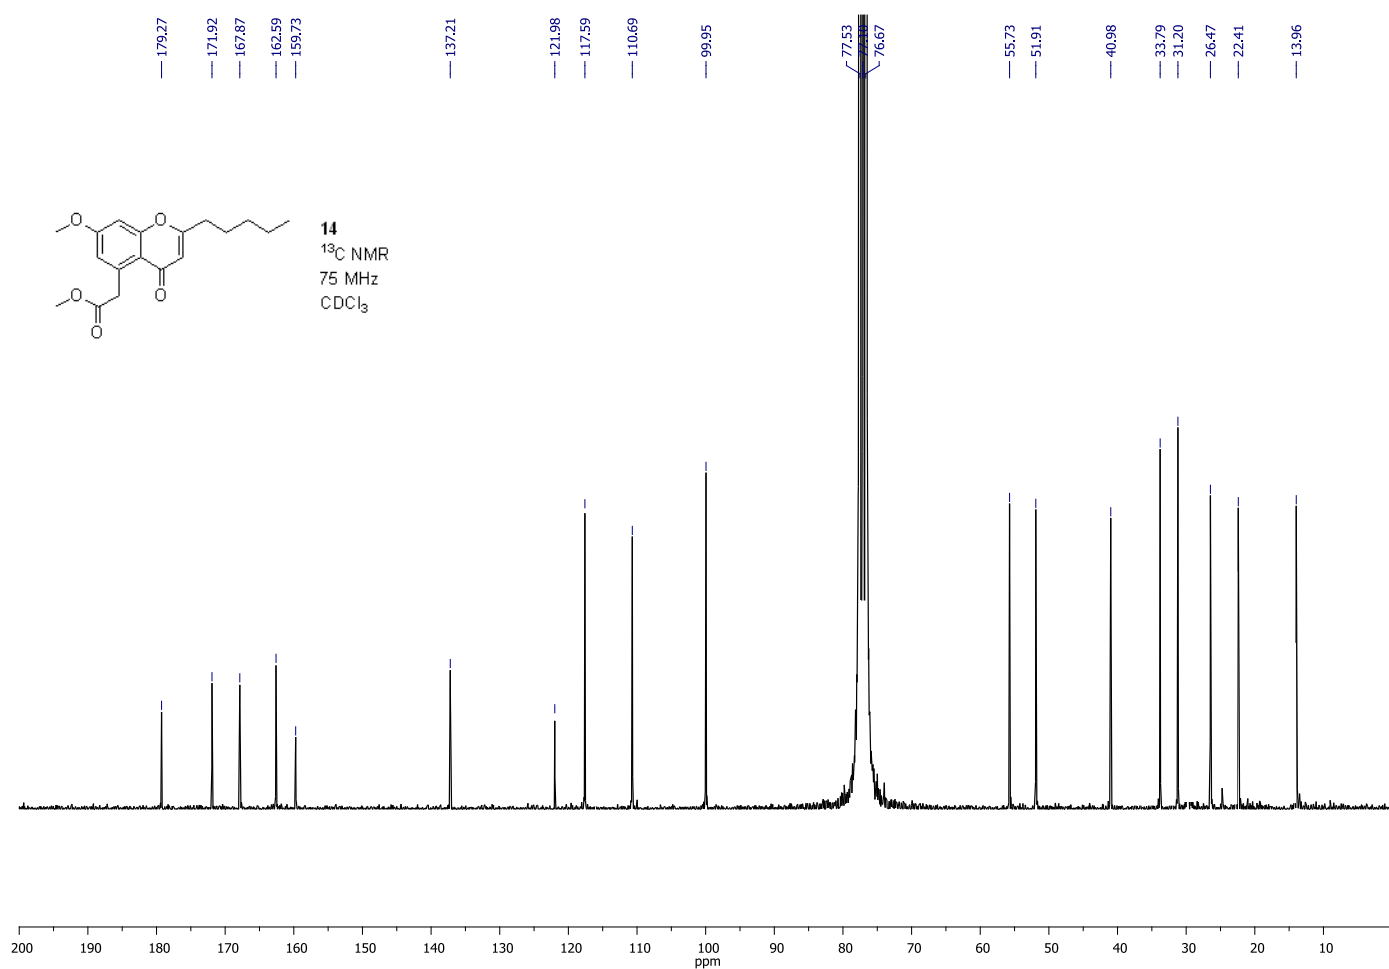

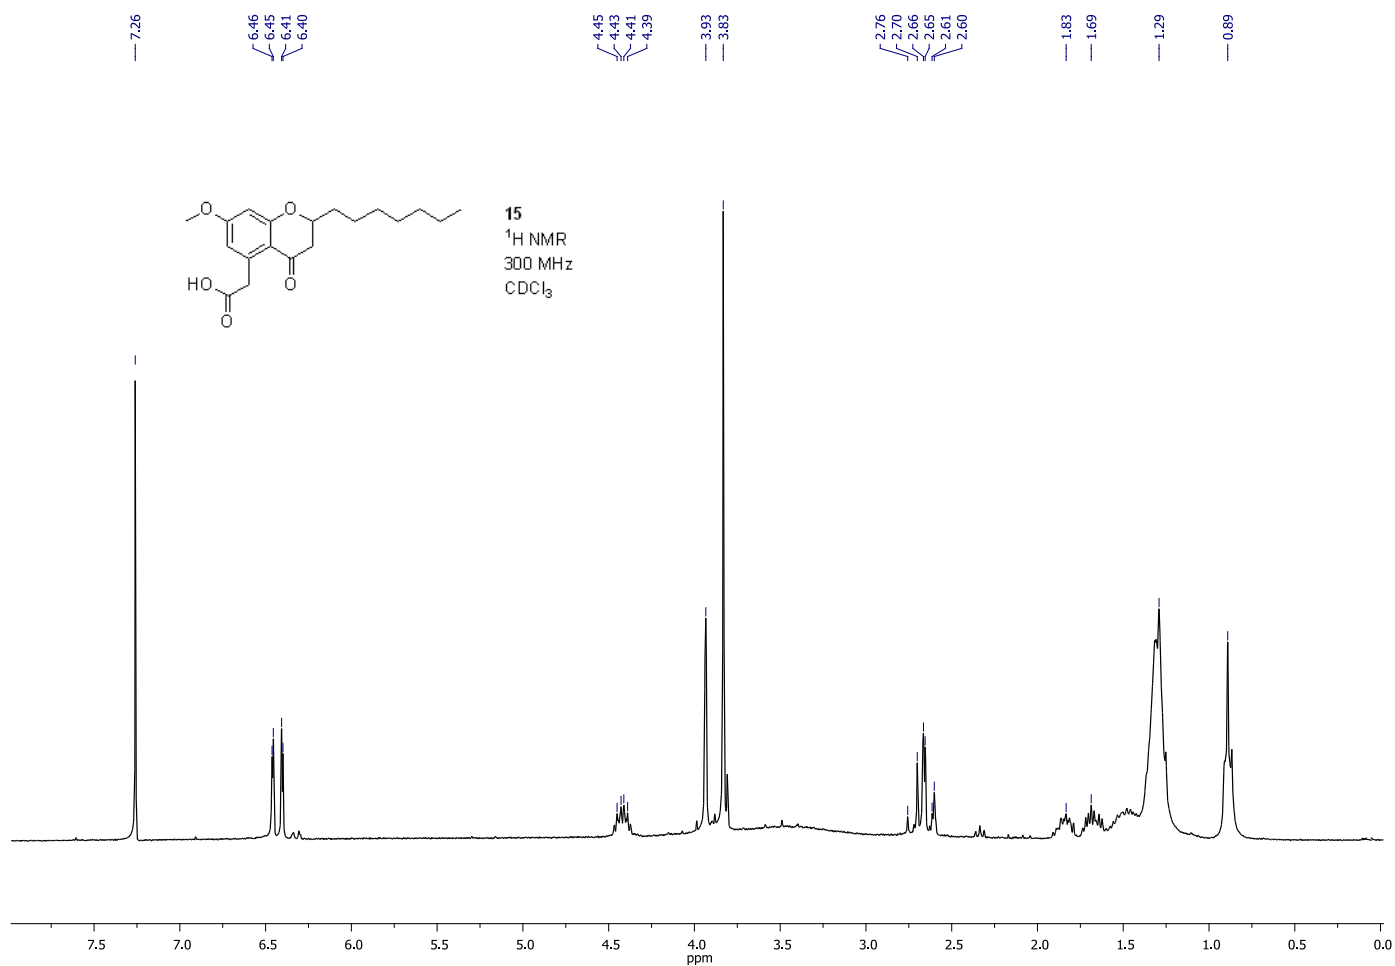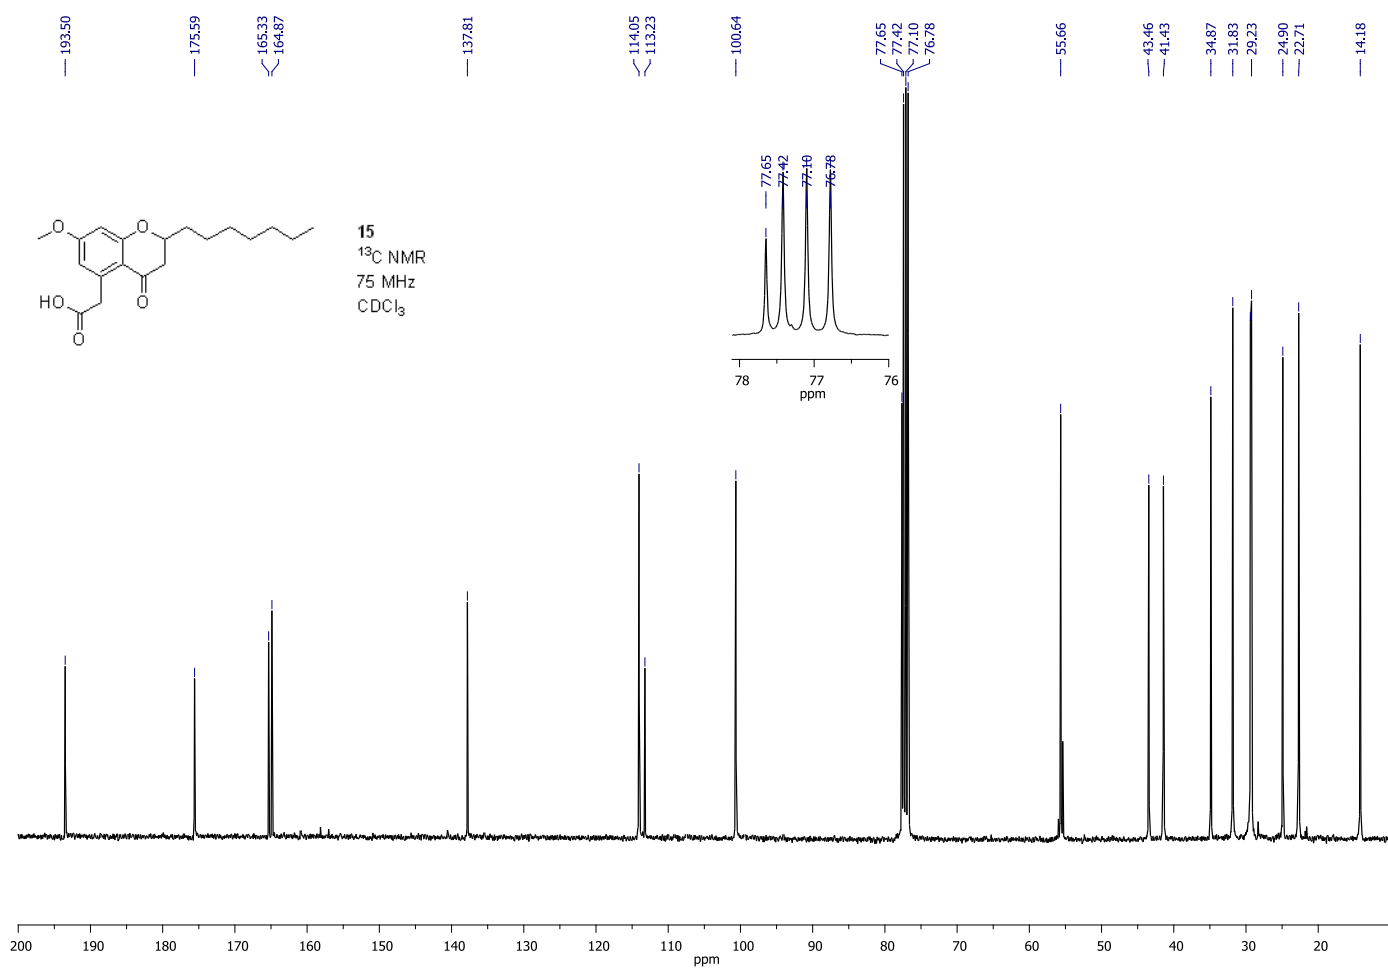

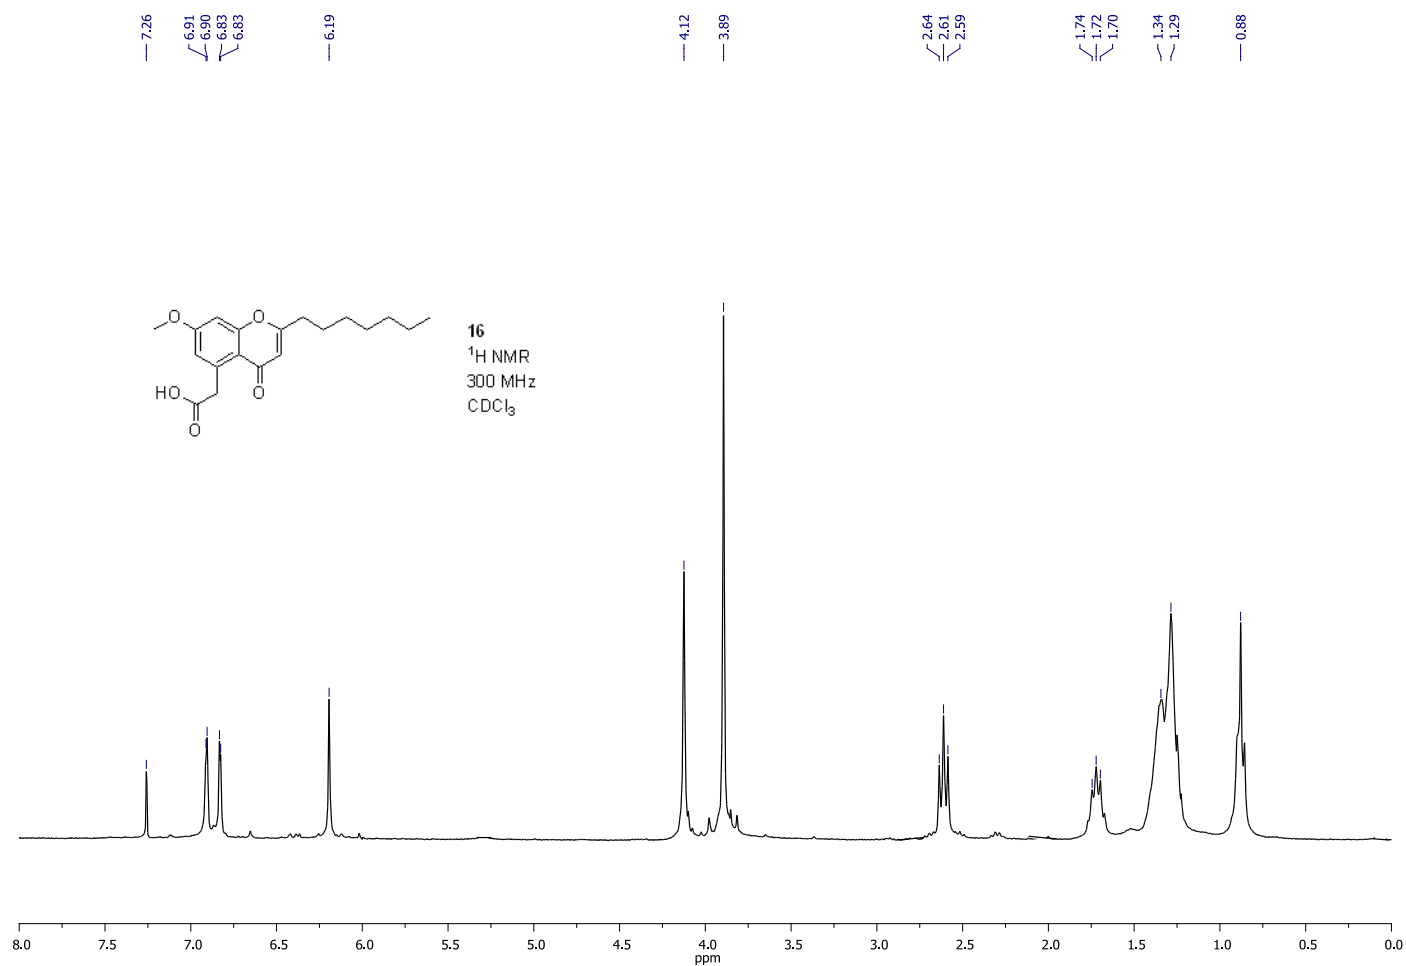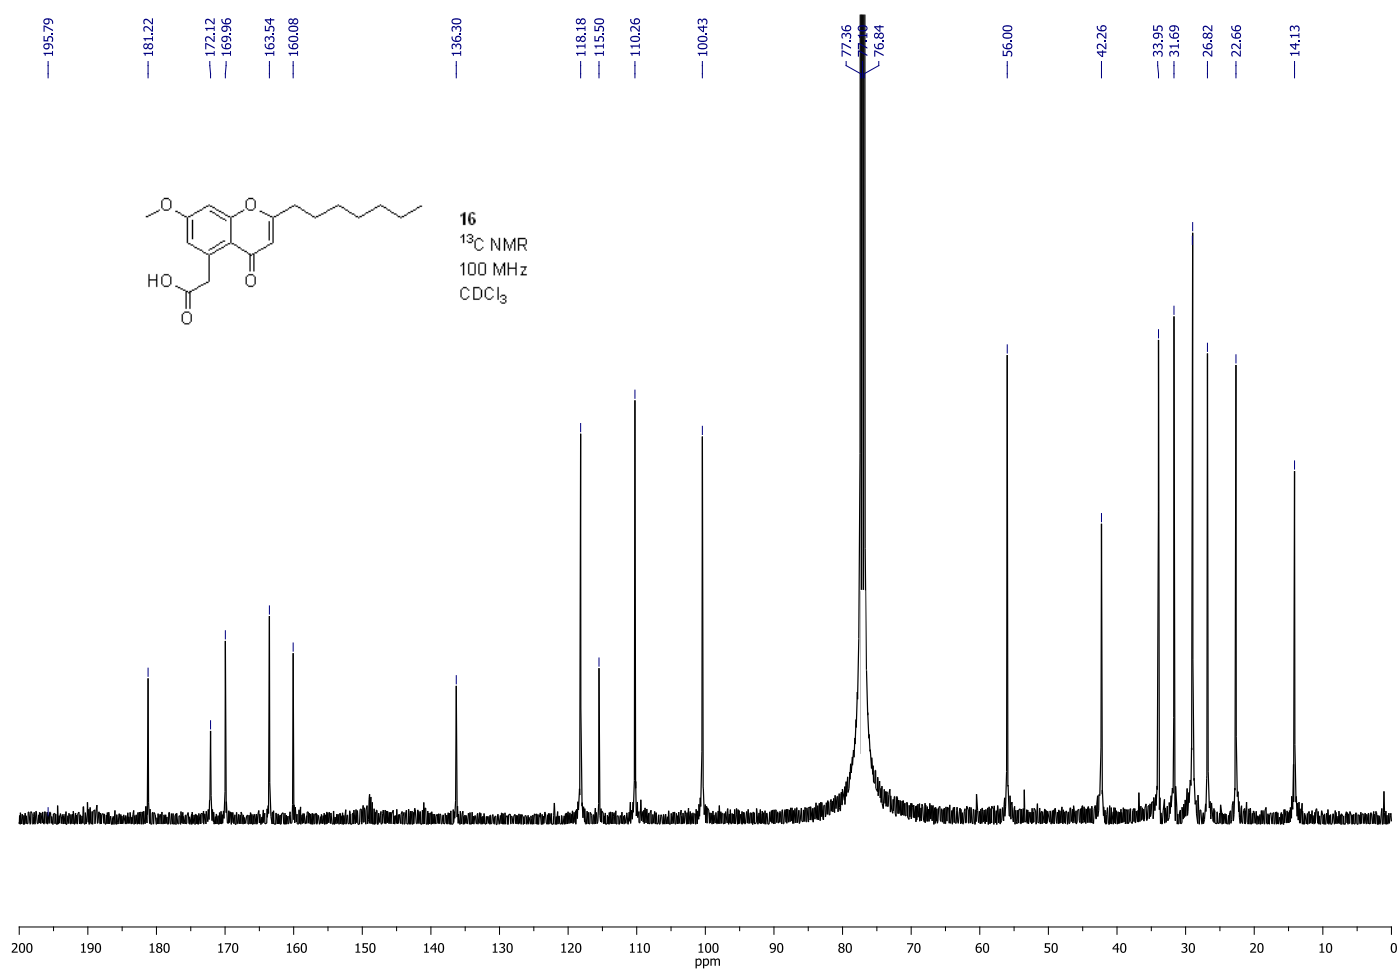

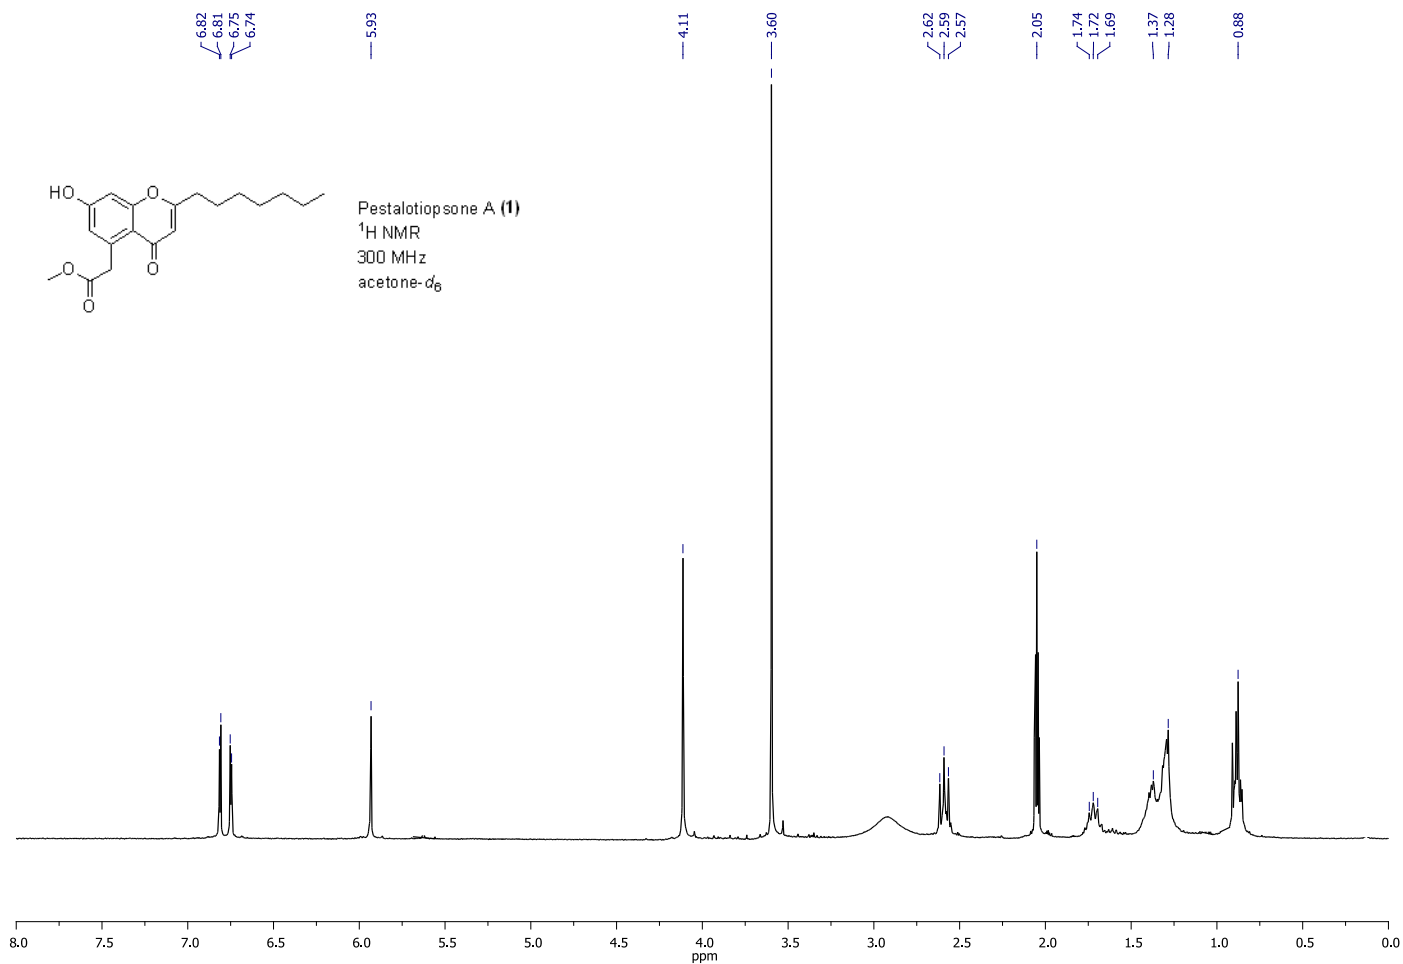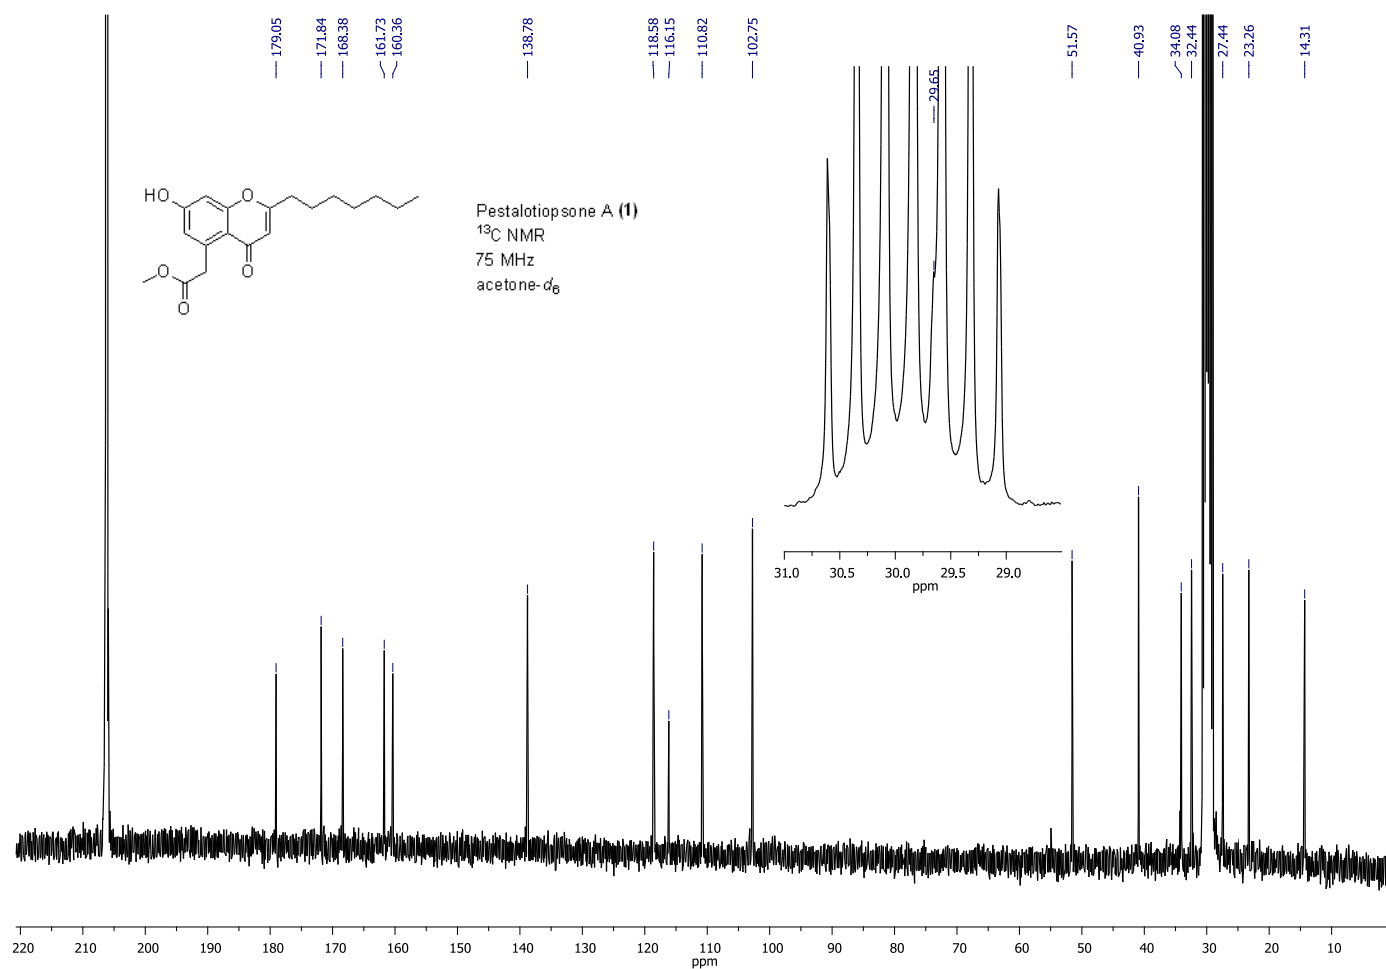

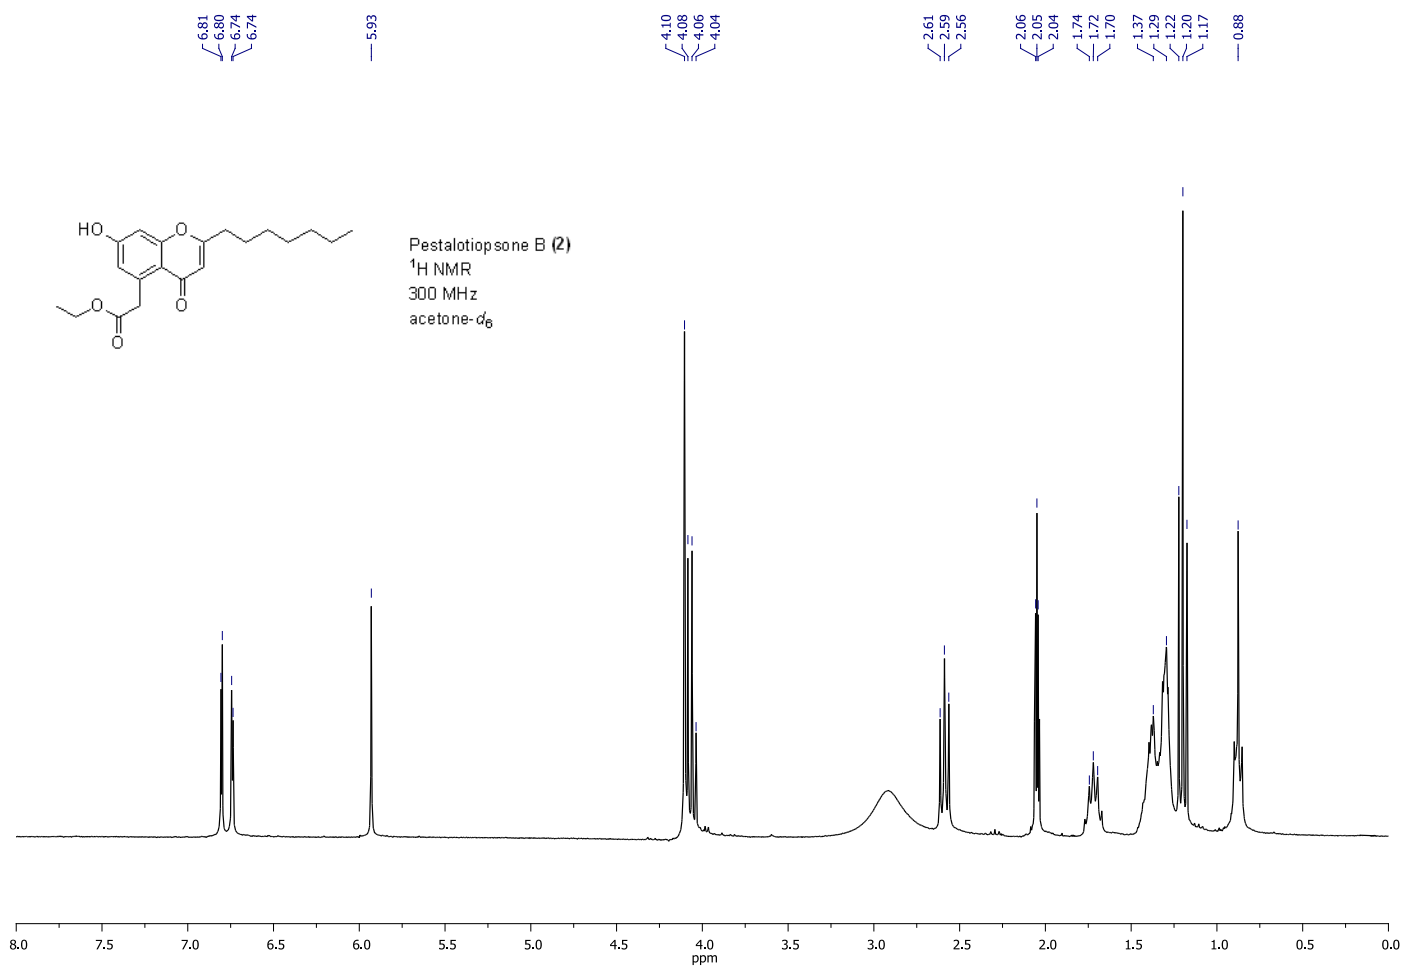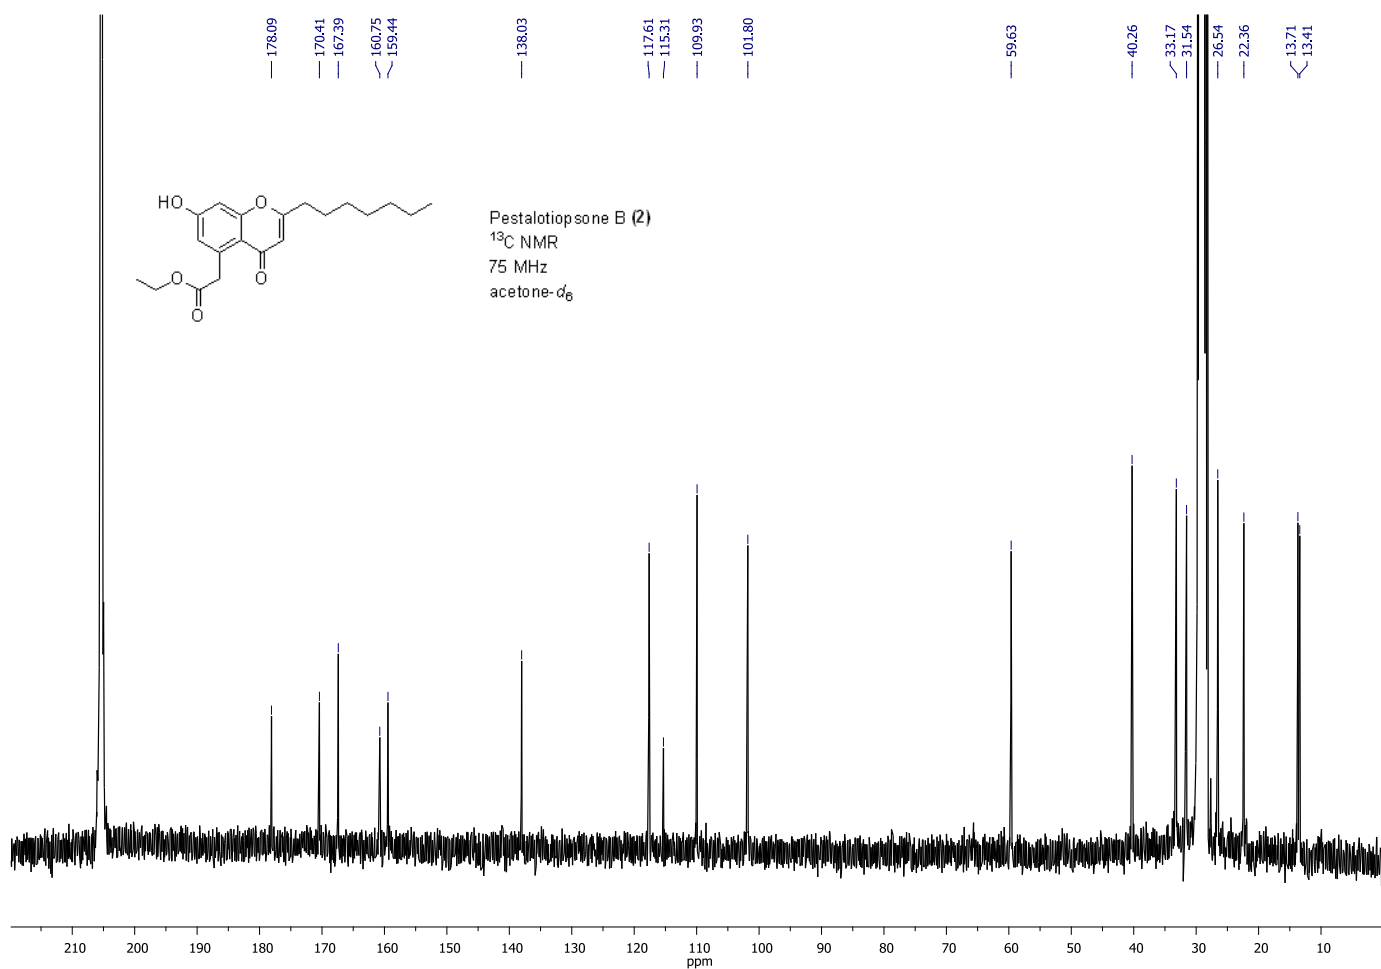

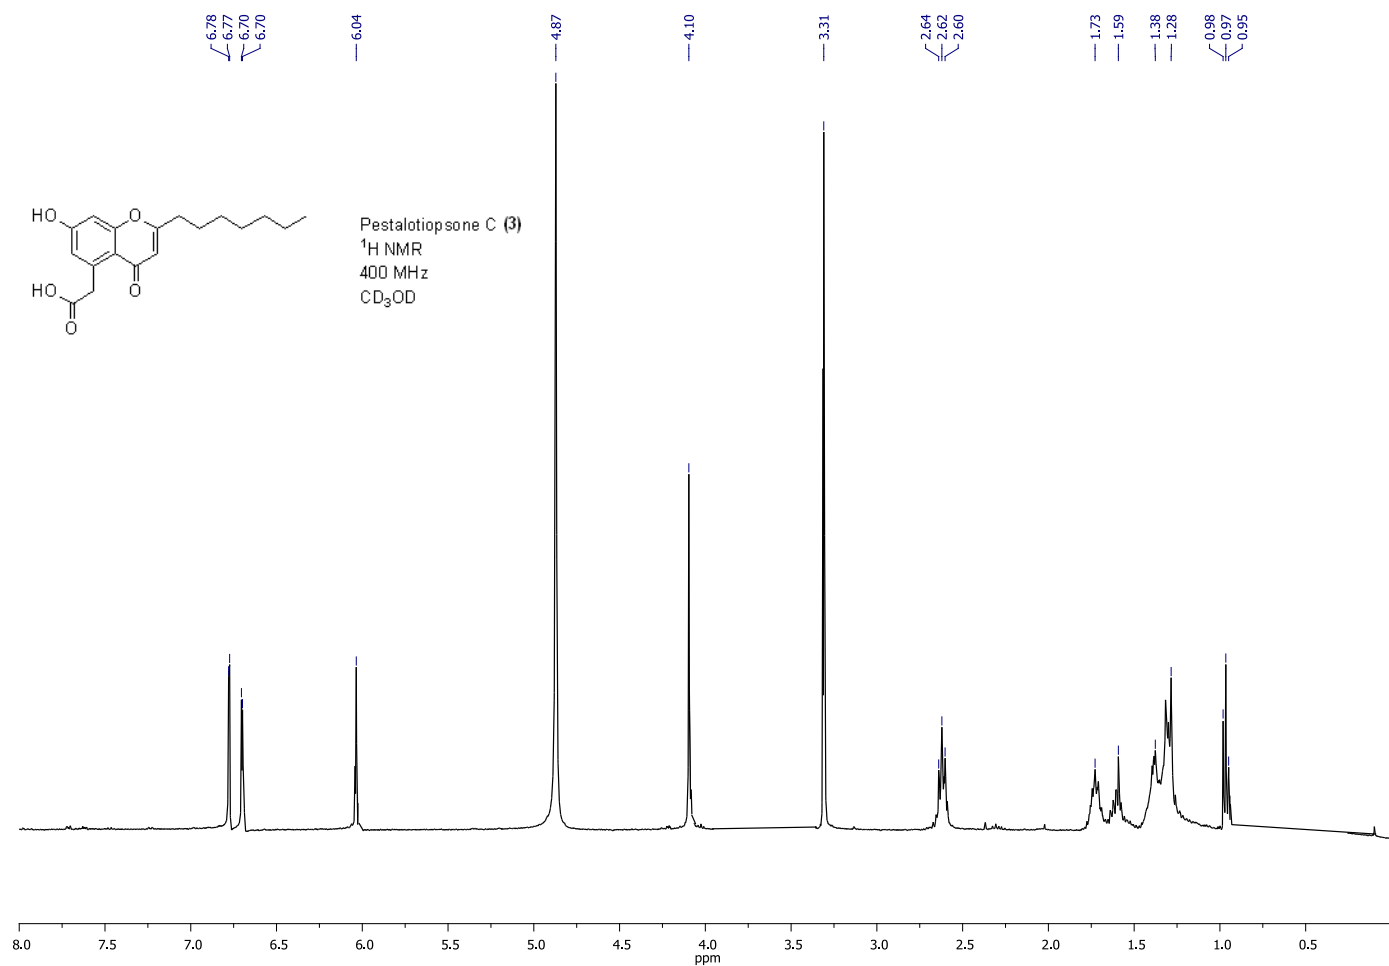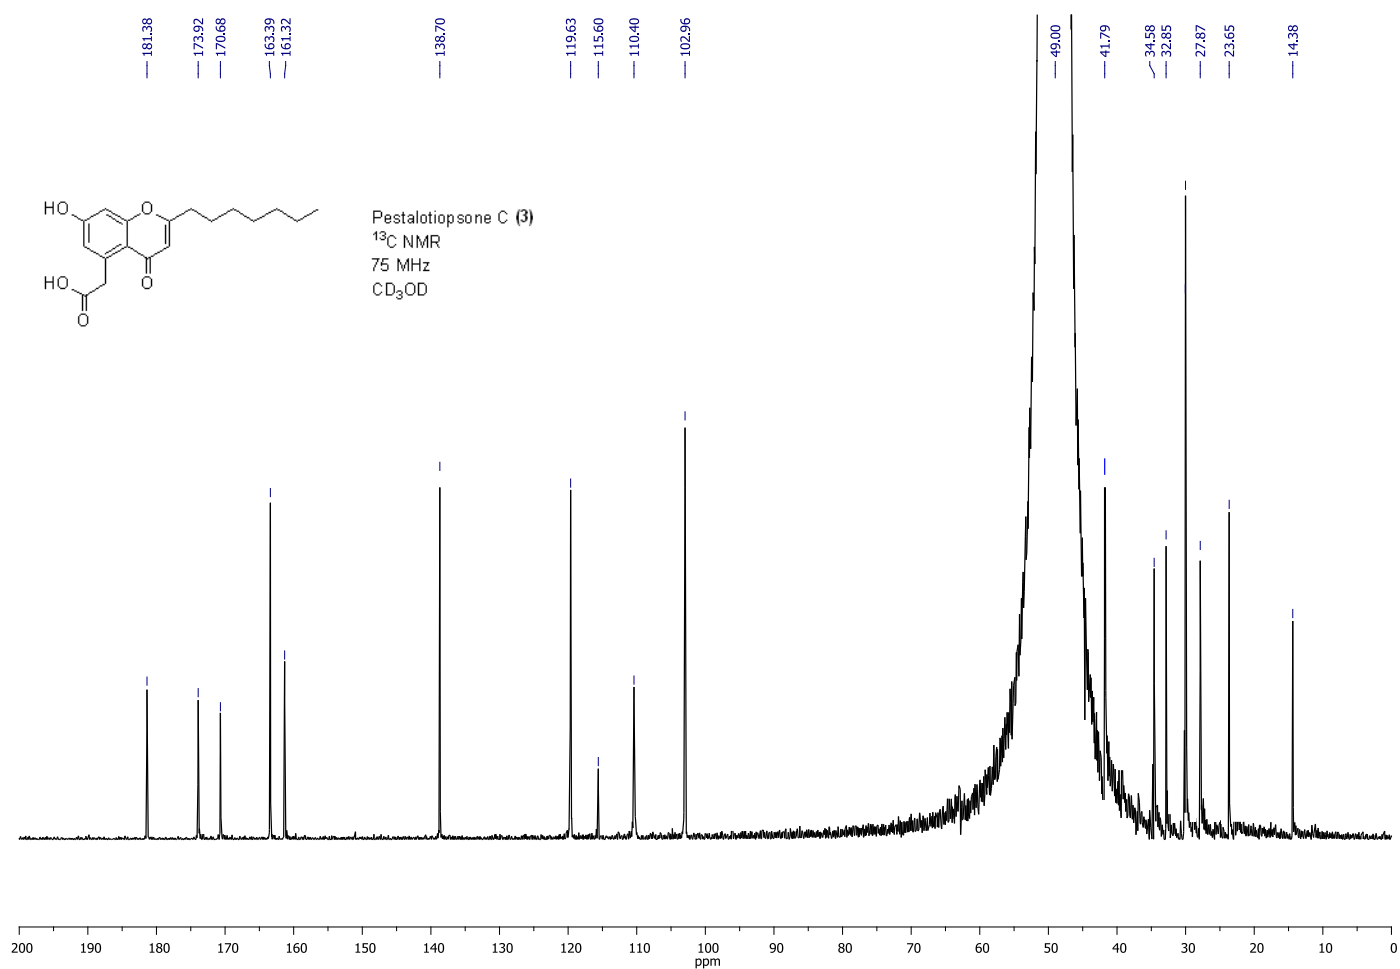

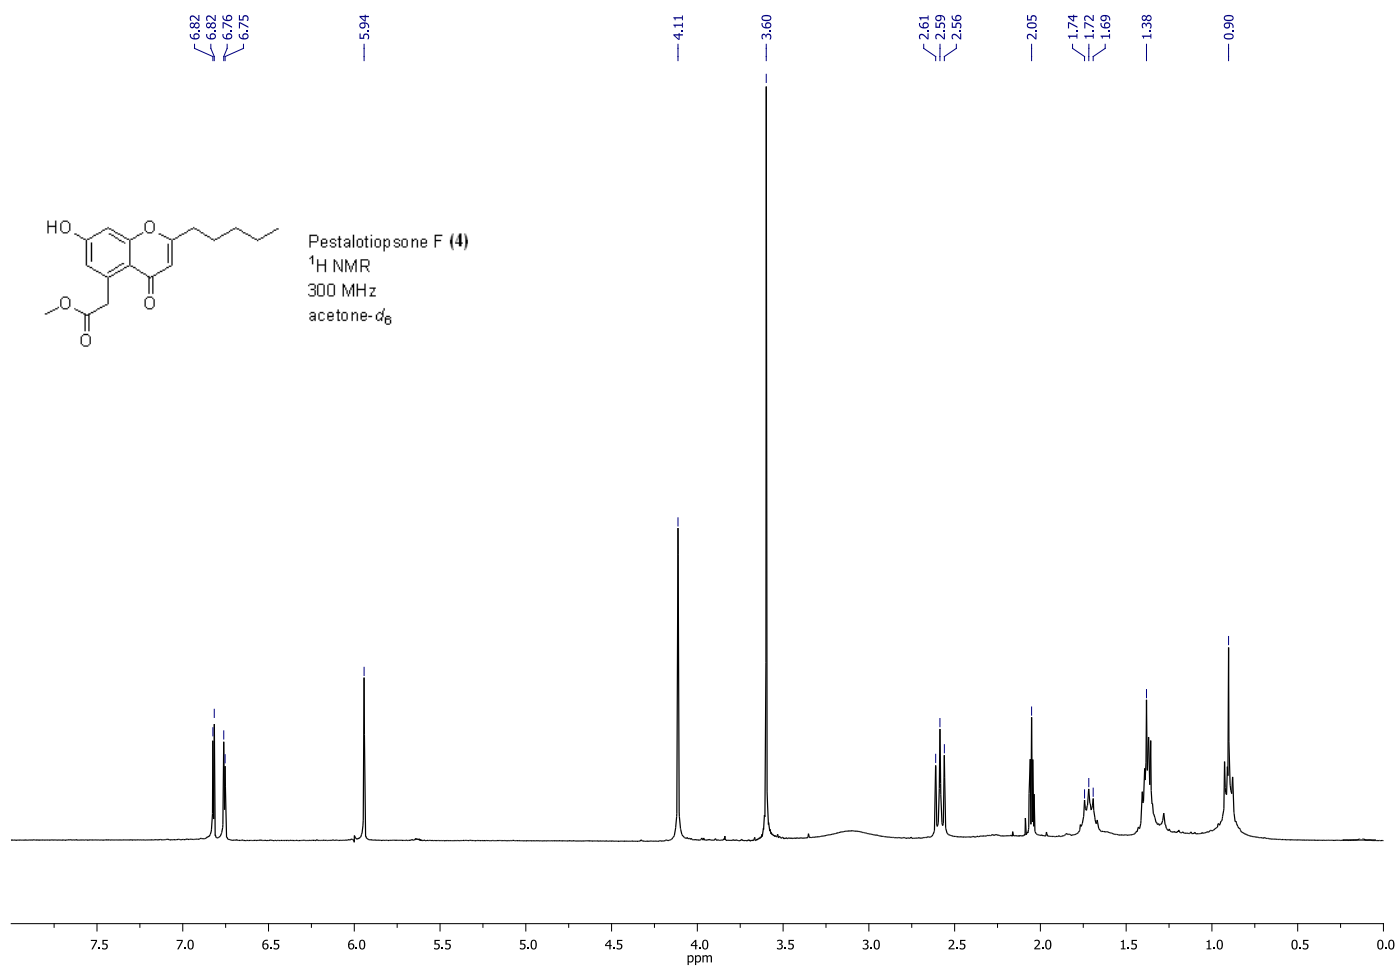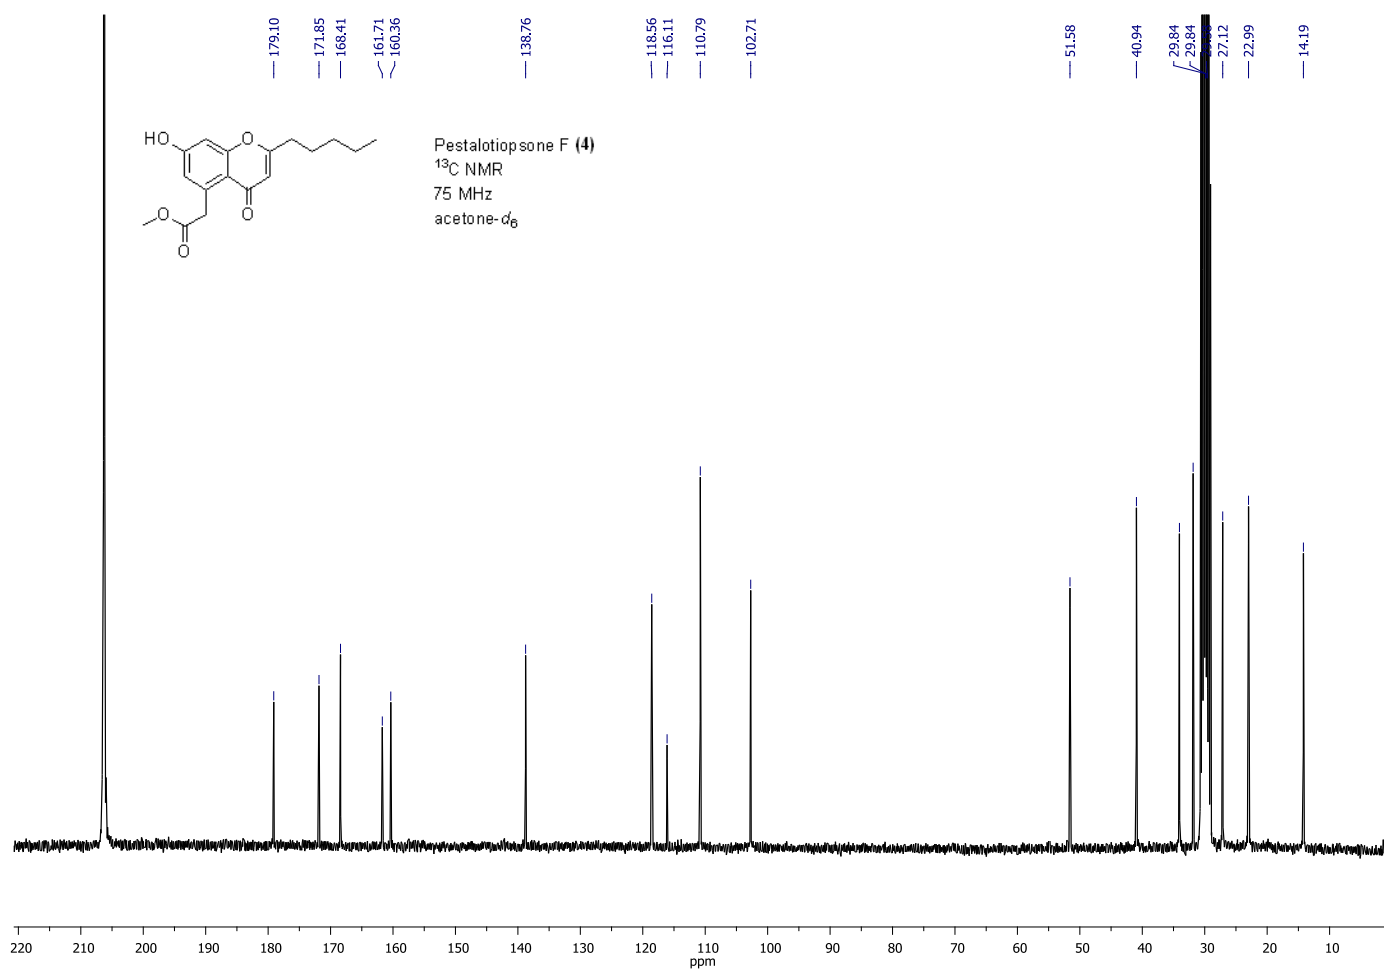



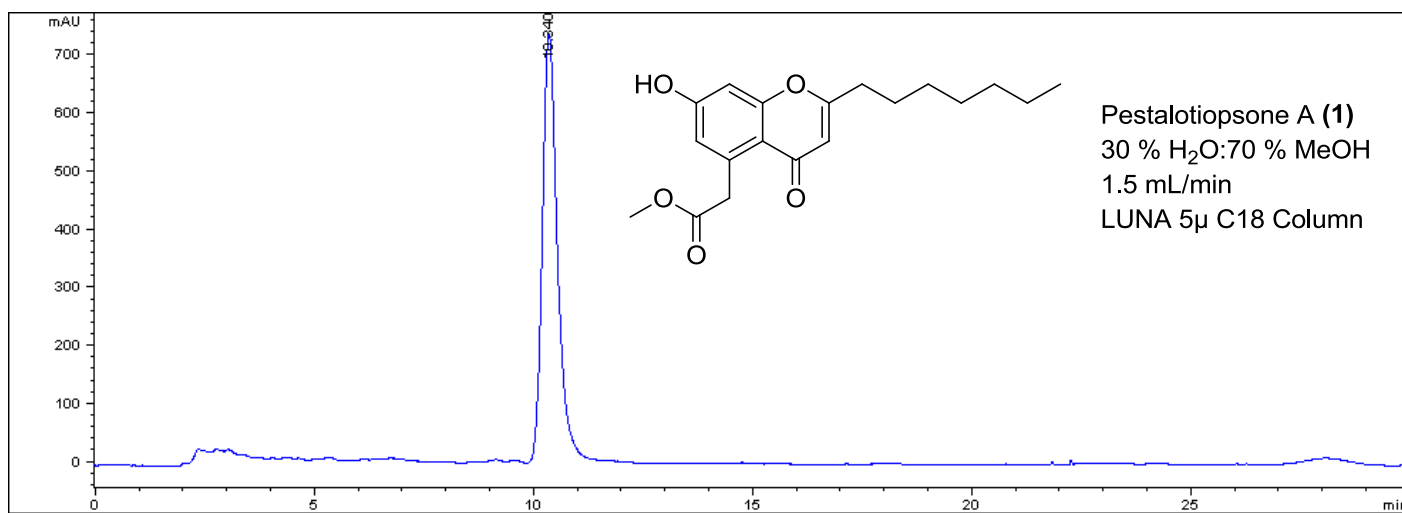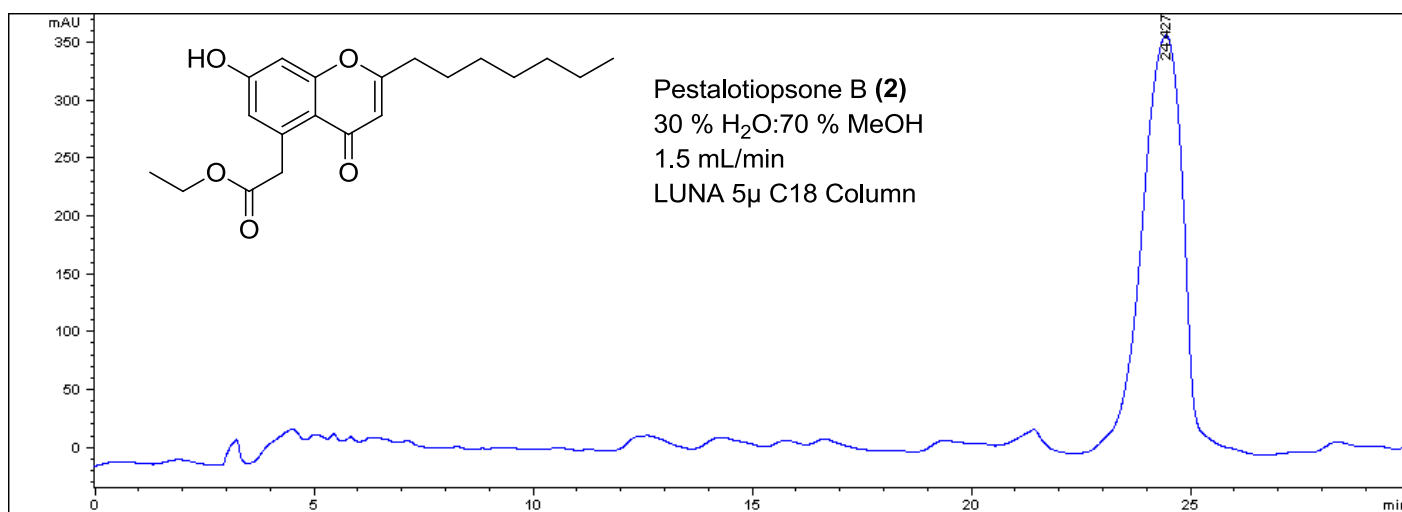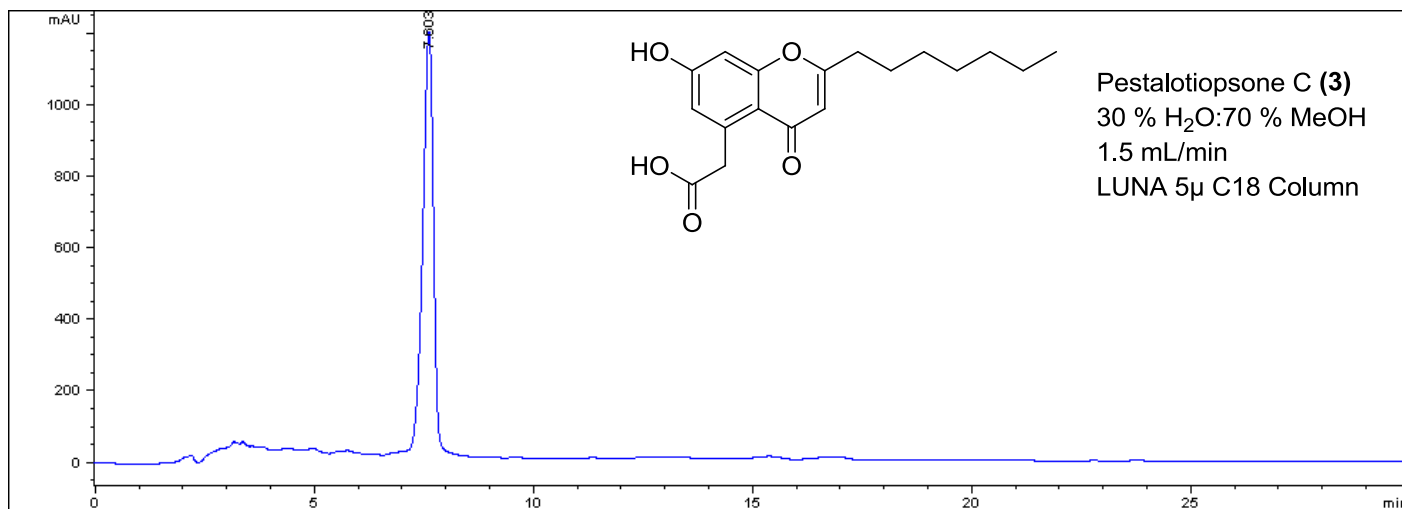

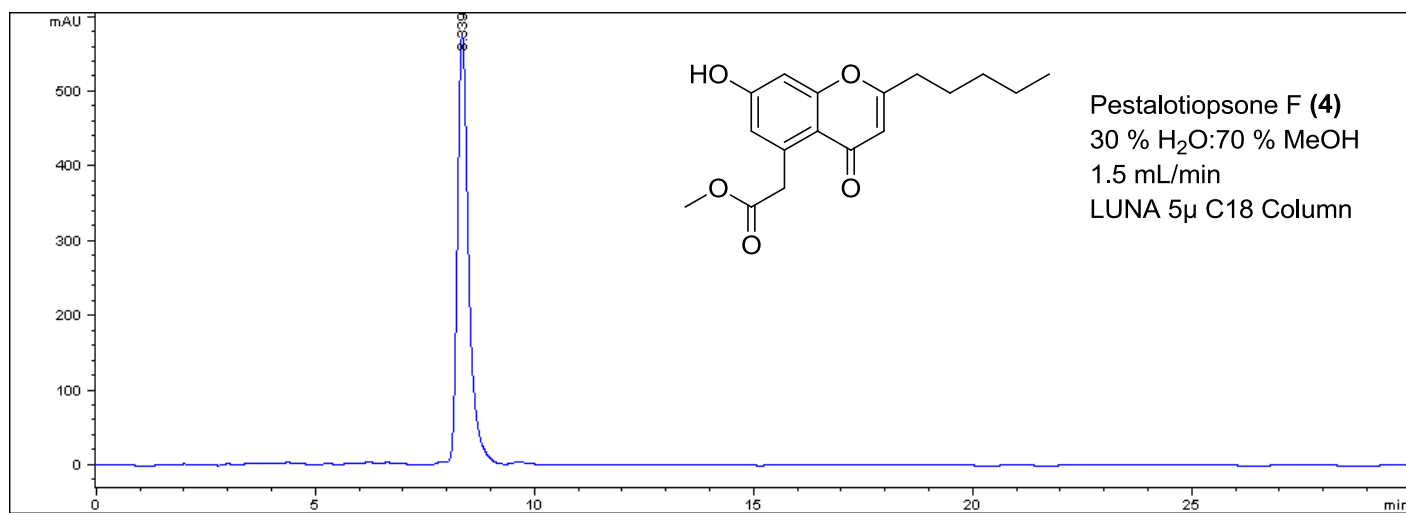

Supplement: c2ob26904j.pdf [file c2ob26904j.pdf]
